# Supplementary material for: Recent glacier mass balance and area changes in the Kangri Karpo Mountainderived from multi-sources of DEMs and glacier inventories
Source: Copernicus journal article supplement (doi:10.5194/tc-2017-153), 2017-09-07
Supplement: Supplementary file [file tc-2017-153-AC1-supplement.pdf]

# Recent glacier mass balance and area changes in the Kangri Karpo Mountains derived from multi-sources of DEMs and glacier inventories

Wu Kunpeng<sup>1,2</sup>, Liu Shiyin<sup>2,3\*</sup>, Jiang Zongli<sup>4</sup>, Xu Junli<sup>5</sup>, Wei Junfeng<sup>4</sup>, Guo Wanqin<sup>2</sup>

<sup>1</sup>School of Resources and Environment, Anqing Normal University, Anqing, Anhui, China

<sup>2</sup>State key Laboratory of Cryospheric Sciences, Northwest Institute of Eco-Environment and Resources, Chinese Academy of Sciences, Lanzhou, China

<sup>3</sup>Institute of International Rivers and Eco-Security, Yunnan University, Yunnan, China

<sup>4</sup>Department of Geography, Hunan University of Science and Technology, Xiangtan, China

<sup>5</sup>Department of Surveying and Mapping, Yancheng Teachers University, Yancheng, China

Correspondence to LIU Shiyin at liusy@lzb.ac.cn or WU Kunpeng at wukunpeng2008@lzb.ac.cn

**Abstract.** Due to the effect of Indian monsoon, the Kangri Karpo Mountains, located in southeast Tibetan Plateau, are the most humid region of Tibetan Plateau, and become one of the most important and concentrated regions with maritime (temperate) glaciers development. Glacier mass loss in Kangri Karpo Mountains is important contributor to global mean sea level rise, and it changes runoff distribution, increases risk of glacial lake outburst floods (GLOFs). Because of their difficult accessibility and high labor costs, the knowledge of glaciological parameters of glaciers in the Kangri Karpo Mountains is still limited. This study presents glacier elevation changes in the Kangri Karpo Mountains, by utilizing geodetic methods based on digital elevation models (DEM) derived from Topographic Maps (1980), the Shuttle Radar Topography Mission (SRTM) DEM (2000), and TerraSAR-X/TanDEM-X (2014). Glacier area and length changes were derived from Topographical Maps and Landsat TM/ETM+/OLI images between 1980 and 2015. Our results show that the Kangri Karpo Mountains contain 1166 glaciers, with an area of  $2048.50 \pm 48.65 \text{ km}^2$  in 2015. Ice cover in the Kangri Karpo Mountains diminished by  $679.51 \pm 59.49 \text{ km}^2$  ( $24.9\% \pm 2.2\%$ ) or  $0.71\% \pm 0.06\% \text{ a}^{-1}$  from 1980 – 2015, however, with nine glaciers in advance from 1980–2015. Glaciers with area of  $788.28 \text{ km}^2$  in the region, as derived from DEM differencing, have experienced a mean mass loss of  $0.46 \pm 0.08 \text{ m w.e. a}^{-1}$  from 1980 – 2014. These glaciers showed slight accelerated shrinkage and significant accelerated mass loss during 2000 – 2015 compared to that during 1980 – 2000, which is consistent with the tendency of climate warming.

## 1 Introduction

Glaciers in the Tibetan Plateau (TP), as a key components in cryosphere system (Li et al., 2008), are the water resource of many major rivers and lakes (Immerzeel et al., 2010). Glacier mass balance is a valuable indicator to understand the climate variability on the TP (Oerlemans, 1994; Yao et al., 2012a). Under the background of global warming, many mountains glaciers have progressively shrunk in mass and extent in past decades (IPCC, 2013). However, glaciers with positive mass balance have also been reported in recent years, especially in the central Karakoram, eastern Pamir and the western TP (Bao et al., 2015; Gardelle et al., 2012b; Gardelle et al., 2013;

1 K ääb et al., 2015; Neckel et al., 2014; Yao et al., 2012a). The relationship between glacier mass  
2 balance and climate change, and the knowledge of water source in cryosphere and its disaster risks,  
3 are become an advanced research hotspot.

4 Glaciers in the Kangri Karpo Mountains are known as temperate characteristic under a  
5 warming climate and abundant precipitation from Indian Monsoon (Li et al., 1986; Shi and Liu,  
6 2000). Based on digitized glacier inventories from Topographic Maps and remote sensing images,  
7 or in situ measurements, glaciers in the Kangri Karpo Mountains have experienced an intense area  
8 reduction, continued terminus retreat from 1980 – 2013, and mass deficit from 2005 – 2009 (Li et  
9 al., 2014; Yang et al., 2010; Yang et al., 2008; Yao et al., 2012a). While some previous studies  
10 showed that the phenomenon of glacier advance exists in the Kangri Karpo Mountains. Based on  
11 aerial photographs, China – Brazil Earth Resources Satellite (CBERS) image and Landsat  
12 Thematic Mapper (TM) image, about 60% of glaciers in the region have been losing their mass  
13 and other glaciers have advanced during 1980 to 2001 (Liu et al., 2006). Shi et al. (2006)  
14 attributed the complex behavior of glacier dynamics to the increase of precipitation suppressing  
15 glacier melting.

16 Previous studies have agreed that glaciers in the Kangri Karpo Mountains have experienced  
17 mass deficit, nevertheless, the results did differ from each other (Gardelle et al., 2013; Gardner et  
18 al., 2013; K ääb et al., 2015; Neckel et al., 2014). Using SRTM DEM and SPOT5 DEM (24  
19 November 2011), glaciers experienced a mean thinning of  $0.39 \pm 0.16 \text{ m a}^{-1}$  in the Kangri Karpo  
20 Mountains (Gardelle et al., 2013). Based on ICESat and SRTM, K ääb et al. (2015), Neckel et al.  
21 (2014) and Gardner et al. (2013) acquired different results over the Kangri Karpo Mountains, with  
22 glacier thickness loss of  $1.34 \pm 0.29 \text{ m a}^{-1}$ ,  $0.81 \pm 0.32 \text{ m a}^{-1}$  and  $0.30 \pm 0.13 \text{ m a}^{-1}$  during 2003 to  
23 2009, respectively.

24 Glacier mass balance can be acquired through glaciological, hydrological and geodetic  
25 methods (Ye et al., 2015). Due to high altitude and harsh climatic conditions, it is hard to carry out  
26 widespread in-situ measurements. Meanwhile, satellite remote sensing is a promising alternative  
27 to conduct glacier mass balance through geodetic method, even in remote mountainous terrains  
28 and over several glaciers at a time (Paul and Haeberli, 2008). Glaciers in the Kangri Karpo  
29 Mountains were almost completely mapped by Topographic Maps that made from aerial  
30 photographs in October 1980, and then mapped by X-band SAR Interferometry (InSAR) in  
31 February 2000 during the SRTM resulting in a Digital Elevation Model. Glaciers in the region were  
32 mapped again by single-pass X-band InSAR from TerraSAR-X on 18 February 2014 and 13 March  
33 2014, and its add-on for digital elevation measurements (TanDEM-X) (Krieger et al., 2007). In  
34 this study, the approach of Differential Synthetic Aperture Radar Interferometry (DInSAR) was  
35 used to estimate glacier mass balance in the Kangri Karpo Mountains between 1980 and 2014.

## 36 2 Study Area

37 The Kangri Karpo Mountains, located on the eastern end of the Nyainqentanglha Mountains in  
38 southeast Tibetan Plateau, extent about 280 km from northwest to southeast. This region is located  
39 in the south of Bomi County, and near to Motuo, Zayu and Basu County (Fig. 1). The north of this  
40 region, Purlung Zangbo, is a tributary of the Yalung Zangbo River, and the other side is Gongri  
41 Gabo River which belongs to west tributary of the Zayu River. Because the east section faces the  
42 entrance of the moist southwest monsoon from Indian Ocean, which enters into the plateau at the  
43 Grand Bend of the Yarlung Zangbo River, and the terrain forces the air flow to rise, it is the region  
44 with the maximum precipitation and highest moisture on the plateau and hence glaciers are

1 well-developed (Shi et al., 2008a).

2 During winter and spring, the westerly jet in the Northern Hemisphere is blocked by Tibetan  
3 Plateau and divided into two branches; southern branch develops into a trough in study area after  
4 bypassing the Himalaya Mountains. Moisture in the Bay of Bengal region is attracted by the  
5 trough, land on TP and form strong snowfall. In summer, due to the effect of topography flattening,  
6 abundant precipitation is transported to study area by the Indian monsoon (Li et al., 1986). Hence,  
7 the Kangri Karpo Mountains are the most humid region of Tibetan Plateau, and become one of the  
8 most important and concentrated regions with maritime (temperate) glaciers development (Shi and  
9 Liu, 2000). It is estimated that the mean summer air temperature at the equilibrium-line altitude  
10 (ELA) of glaciers in the region is usually above 1 °C, and annual precipitation is about 2500–3000  
11 mm (Shi et al., 1988). Most glaciers in study area are in the state of pressure melting point, glacier  
12 surface ablation is intensive and the velocity of glacier movement is fast (Li et al., 1986). Due to  
13 the large ablation and accumulation rates in this maritime region, glacier mass turnover is large in  
14 the Kangri Karpo Mountains.

15 According to the first Chinese Glacier Inventory, the Kangri Karpo Mountains contain 1320  
16 glaciers, with a total area and volume of 2655.2 km<sup>2</sup> and 260.3 km<sup>3</sup>, respectively (Mi et al., 2002).  
17 Yalong Glacier (CGI code: 5O282B37) is the largest one among these glaciers (191.4 km<sup>2</sup> in  
18 surface area and 32.5 km in length), while the Ata Glacier (CGI code: 5O291B181), located on the  
19 south slope of the Kangri Karpo Mountains, is the glacier with the lowest terminus at 2450 m,  
20 16.7 km in length and 13.75 km<sup>2</sup> in area (Liu et al., 2006). Comparison of photographs taken in  
21 different time found that tongue position of Ata Glacier, ice volume and glacial surface conditions  
22 have changed greatly in the past decades (Yang et al., 2008).

## 23 24 **3 Data**

### 25 **3.1 Topographic Maps**

26 Five topographic maps on 1:100000 scale and fifty topographic maps on 1:50000 scale generated  
27 from aerial photos acquired in October 1980 by the Chinese Military Geodetic Service was  
28 employed in the present study. Using a seven parameter transformation method, these maps  
29 georeferenced into the 1954 Beijing Geodetic Coordinate System (BJ54) with geoid (datum level  
30 is Yellow Sea mean sea level at Qingdao Tidal Observatory in 1956) were re-projected into World  
31 Geodetic System 1984 (WGS1984)/Earth Gravity Model 1996 (EGM96) (Xu et al., 2013). The  
32 contour lines of the maps were manually digitized and then converted into raster DEM (TOPO  
33 DEM) with a 30 m grid cell by employing the Thiessen polygon method (Shangguan et al., 2010;  
34 Wei et al., 2015b; Zhang et al., 2016a). According to the national photogrammetrical standard issued  
35 by the Standardization Administration of the People's Republic of China (GB/T12343.1, 2008),  
36 the nominal vertical accuracies of these topographic maps were controlled within 3-5 m for the  
37 flat (with slopes < 2 °) and hilly areas (with slope 2-6 °) and controlled within 8-14 m for the  
38 mountain (with slope 6-25 °) and high mountain areas (with slope >25 °). Since the slopes of the  
39 most of the glacierized areas in the Kangri Karpo Mountains were gentle (~19 °), the vertical  
40 accuracy of the TOPO DEM is better than 9 m on glaciers.

### 41 **3.2 Shuttle Radar Topography Mission**

42 The SRTM was conducted to acquire interferometric synthetic aperture radar (InSAR) data  
43 simultaneously in the C-band and X-band frequencies from 11 to 22 February 2000 (Farr et al.,

1 2007). The SRTM DEM can be referred to the glacier surface in the last balance year (1999) with  
2 slight seasonal variances (Gardelle et al., 2013; Pieczonka et al., 2013; Zwally et al., 2011). The  
3 X-band SAR system was operated with a swath width of 45 km leaving large data gaps in the  
4 resulting X-band DEM (Rabus et al., 2003). Unfortunately, only 23% of the Kangri Karpo glaciers  
5 are covered by the data set. The unfilled finished SRTM C-band DEM, with a swath width of 225  
6 km and 1 arc-second resolution (approximately 30 m) in WGS84/EGM96, is freely available for  
7 scientific purposes (<http://earthexplorer.usgs.gov/>). Hence, the unfilled finished SRTM C-band  
8 DEM was employed to study ice surface elevation change.

### 9 **3.3 TerraSAR-X/TanDEM-X**

10 TerraSAR-X was launched in June 2007 by the German Aerospace Center (DLR). TerraSAR-X  
11 and its add-on for digital elevation measurements (TanDEM-X) are flying in a close orbit  
12 formation acting as a flexible single-pass SAR interferometer (Krieger et al., 2007).  
13 Interferometric data acquisition can be performed in the pursuit monostatic mode, the bistatic  
14 mode and the alternating bistatic mode. Current baseline for operational DEM generation is the  
15 bistatic mode which minimizes temporal decorrelation and makes efficient use of the transmit  
16 power (Krieger et al., 2007).

17 The experimental Co-registered Single look Slant range Complex (CoSSC) files, acquired in  
18 bistatic InSAR stripmap mode on 18 February 2014 and 13 March 2014, were employed in this study  
19 (Fig. 2 and Table 1). The CoSSC files have been focused and co-registered at the TanDEM-X  
20 Processing and Archiving Facility (PAF). The GAMMA SAR and interferometric processing software  
21 was employed for the interferometric processing of the CoSSC files (Werner et al., 2000).

### 22 **3.4 Landsat images**

23 In order to analyze the relationship between glacier mass balance and changes in glacier extent, two  
24 Landsat Thematic Mapper (TM) scenes, one Landsat Enhanced Thematic Mapper Plus (ETM+) scene  
25 and three Landsat Operational Land Imager (OLI) scenes were employed in this study (Table 1). It is  
26 better that Landsat images were acquired in the same year with SRTM and TerraSAR-X/TanDEM-X  
27 acquisitions, while because of the low quality of Landsat images in 2000 and 2014, Landsat  
28 TM/ETM+ images in 2001 and Landsat OLI images in 2015 with high quality were selected in  
29 this study. All Landsat images are available from the United States Geological Survey (USGS), and are  
30 orthorectified with the SRTM and ground control points from the Global Land Survey 2005 (GLS2005)  
31 dataset. Amongst the Landsat images, the co-registered TerraSAR-X coherence image, the SRTM-X  
32 DEM and Topographic Maps, almost no horizontal shift was observed. For Landsat ETM+/OLI images,  
33 pan-sharpening employing principal component analysis was performed to enhance the spatial  
34 resolution to 15 m.

## 36 **4 Methods**

### 37 **4.1 Glacier Inventory**

38 The outlines of glaciers in October 1980 were delineated manually from Topographic Maps. These  
39 maps were geo-referenced and rectified with a kilometer grid, and validated by reference to the  
40 original aerial photographs to update the first Chinese Glacier Inventory (Wu et al., 2016b).

41 Global inventory of glacier outlines can be available through the Randolph Glacier Inventory  
42 (Arendt et al., 2015). For the Kangri Karpo Mountains, these glacier outlines are taken from “the

1 Second Chinese Glacier Inventory” (CGI2) that delineated from Landsat TM on 8 September  
2 2005 (Guo et al., 2015). An inventory of high-mountain Asian glaciers named “Glacier Area  
3 Mapping for Discharge from the Asian Mountains” was compiled from 356 Landsat ETM+ scenes  
4 in 226 path-row sets (Nuimura et al., 2015). The GAMDAM outlines are nearly all from  
5 1999-2003 and thus conform with the recommendation for the compilation of glacier inventory to  
6 select imagery as close to 2000 as possible (Arendt et al., 2015; Paul et al., 2009). Hence, Landsat  
7 TM/ETM+ scenes were used to validate and update the CGI2 and GAMDAM glacier inventory,  
8 and generated the 2000 inventory of the detailed study area.

9 A semi-automated approach using the TM3/TM5 band ratio was applied to delineate glacier  
10 outlines in 2015 using Landsat OLI images (Bolch et al., 2010b; Paul et al., 2009; Racoviteanu et  
11 al., 2009). To ensure that ice patches were larger than 0.01 km<sup>2</sup>, a 3 by 3 median filter was applied  
12 to eliminate isolated pixel (Bolch et al., 2010b; Wu et al., 2016b). Then, the derived glacier  
13 polygons are checked manually against images from adjacent years with less or no snow and  
14 cloud-free, to discriminate proglacial lakes, seasonal snow, boulders on the glacier and  
15 debris-covered ice (Fig. 3). The final contiguous ice coverage was divided into individual glacier  
16 polygons using topographical ridgelines (TRLs), which were automatically generated based on the  
17 SRTM-C DEM (Guo et al., 2011).

18 The best way to assess the accuracy of glacier outlines is to compare extracted results with  
19 independently digitized glacier outlines from high resolution aerial imagery at random locations  
20 (Bolch et al., 2010a; Paul et al., 2003). Previous studies indicated that the average offsets between  
21 glacier outlines derived from Topographic Maps and Corona-image outlines was  $\pm 6.8$  m (Wu et al.,  
22 2016b), and the average offsets between Landsat-image outlines and real-time kinematic  
23 differential GPS (RTK-DGPS) measurements, Google Earth<sup>TM</sup> images with a spatial resolution  
24 better than 1 m, were  $\pm 10$  m and  $\pm 30$  m for the delineation of clean and debris-covered ice,  
25 respectively (Guo et al., 2015). On the basis of these average offsets, mean relative errors of  
26  $\pm 1.3\%$ ,  $\pm 2.0\%$  and  $\pm 2.4\%$  were calculated for glacier area in 1980, 2000 and 2015, respectively.

## 27 4.2 Glacier Length

28 Glacier length is a key parameter in glacier inventory and its vector representation (glacier  
29 centerlines) is important to model future glacier evolution and calculate glacier ice volume (Le  
30 Bris and Paul, 2013). Some researchers defined it as the central flowline from the highest glacier  
31 elevation to the terminus, whereas others regard the length of the longest flowline as glacier length  
32 (Kienholz et al., 2014; Leclercq et al., 2014). The length change can be calculated by intersecting  
33 the central flowline with the respective glacier outline (Paul and Svoboda, 2010), or calculated as  
34 the average length from the intersection of the glacier outlines with the stripes which drawn  
35 parallel to the main flow direction of the glaciers (Koblet et al., 2010).

36 In this study, a new strategy based on a glacier axis concept from glacier morphology  
37 perspective was applied that requires only glacier outlines and a DEM as input (Yao et al., 2015).  
38 As the base for the glacier axis concept we assume that the main direction of any given glaciers  
39 can be defined as a curved line from its highest to its lowest elevation. At first, the outline of given  
40 glacier is divided into two curved lines by its highest and its lowest point. Using the two curved  
41 lines, the polygon of given glacier is divided into two regions by Euclidean distance. Glacier axis  
42 is the common boundary of the two regions, and it can be defined as the glacier centerline. An  
43 error estimation of the resulting glacier centerlines was performed that compared the  
44 semi-automatically generated results to high resolution aerial imagery at the terminus of glacier

centerlines. A Corona image with a resolution of 4 m and Google Earth<sup>TM</sup> images with a resolution better than 1 m were used to evaluate the accuracy of glacier centerlines. Hence, the uncertainties of glacier centerlines from Topographic Maps and Landsat images are no more than 6 m and 7.5 m, respectively.

### 4.3 Glacier elevation changes

The TerraSAR-X/TanDEM-X acquisitions were processed by differential SAR interferometry (DInSAR) (Neckel et al., 2013a) using GAMMA SAR and interferometric processing software (Werner et al., 2000).

The interferometric phase of the single-pass TerraSAR-X/TanDEM-X interferogram could be described by

$$\Delta_{\phi_{\text{TSX/TDX}}} = \Delta_{\phi_{\text{orbit}}} + \Delta_{\phi_{\text{topo}}} + \Delta_{\phi_{\text{atm}}} + \Delta_{\phi_{\text{scat}}} \quad (1)$$

where  $\Delta_{\phi_{\text{TSX/TDX}}}$  is the difference of phases of phases  $\phi_{\text{TSX}}$  and  $\phi_{\text{TDX}}$  simultaneously acquired by TerraSAR-X and TanDEM-X.  $\Delta_{\phi_{\text{orbit}}}$  is the phase difference induced by the different acquisition geometry of the SAR sensors, and  $\Delta_{\phi_{\text{topo}}}$  is the phase difference induced by topography.  $\Delta_{\phi_{\text{atm}}}$  and  $\Delta_{\phi_{\text{scat}}}$  are the phase differences induced by atmospheric conditions and different scattering on the ground. As the data of TerraSAR-X/TanDEM-X were acquired simultaneously, the same atmospheric conditions and scattering are assumed for both SAR antennas, which set  $\Delta_{\phi_{\text{atm}}}$  and  $\Delta_{\phi_{\text{scat}}}$  in Eq. (1) to zero.  $\Delta_{\phi_{\text{orbit}}}$  could be removed from the interferogram by subtracting a simulated flat-earth phase trend (Rosen et al., 2000).

The DInSAR approach can be described by

$$\Delta_{\phi_{\text{diff}}} = \Delta_{\phi_{\text{TSX/TDX}}} - \Delta_{\phi_{\text{SRTM-C}}} \quad (2)$$

where  $\Delta_{\phi_{\text{SRTM-C}}}$  is the interferometric phase of the February 2000 SRTM-C acquisition. Due to the unavailability of the raw interferometric data of the SRTM-C acquisition,  $\Delta_{\phi_{\text{SRTM-C}}}$  was simulated from SRTM-C DEM data using the satellite geometry and baseline model of the TerraSAR-X/TanDEM-X pass. Therefore the differential phase  $\Delta_{\phi_{\text{diff}}}$  is solely based on changes in  $\Delta_{\phi_{\text{topo}}}$  between data acquisitions (Neckel et al., 2013b).

In order to improve the phase-unwrapping procedure and minimize errors, the unfilled finished SRTM C-band DEM were employed in this study. Before generating the differential interferogram, precise horizontal offset registration and fitting between the SRTM C-band DEM and the TerraSAR-X/TanDEM-X acquisitions is necessary. Based on the relation between the map coordinates of the SRTM C-band DEM segment covering the TerraSAR-X/TanDEM-X master file, and the SAR geometry of the respective master file, an initial lookup table was calculated. While the areas of radar shadows and layover in the TerraSAR-X/TanDEM-X interferogram would induce gaps in the lookup table, a method of linear interpolation between the gap edges in each line of the lookup table was used to fill these gaps. The offsets between the master scene and the simulated intensity of the SRTM C-band DEM, were calculated using cross correlation optimization of the simulated SAR images employing *GAMMA's offset\_pwrn* module. The horizontal registration and geocoding lookup table were refined by these offsets. The SRTM C-band DEM was translated from geographic coordinates into SAR coordinates via the refined geocoding lookup table, and conversely, the final difference map was translated from SAR coordinates into geographic coordinates. Then a differential interferogram was generated by the TerraSAR-X/TanDEM-X interferogram and the simulated phase of the co-registered SRTM C-band DEM. An adaptive filtering approach was used to filter the differential interferogram (Goldstein and Werner, 1998), and then *GAMMA's* minimum cost flow (MCF) algorithm was

1 employed to unwrap the flattened differential interferogram. According to the computed  
2 phase-to-height sensitivity and select ground control points (GCPs) from the respective off-glacier  
3 pixel locations in the SRTM C-band DEM, the unwrapped differential phase was converted to  
4 absolute differential heights. While, a residual not covered by the baseline refinement would be  
5 existed, and can be regarded as a linear trend that estimated by a two dimensional first order  
6 polynomial fit in off-glacier regions. The linear trend and a constant vertical offset were removed  
7 from the maps of absolute differential heights. Finally, the resulting data sets were translated to a  
8 metric cartographic coordinate system with  $30\text{ m} \times 30\text{ m}$  pixel spacing (Neckel et al., 2013a).  
9 The same method of DInSAR was employed to acquire the glacier elevation change from 1980 to  
10 2014 with the data sets of TOPO DEM and TerraSAR-X/TanDEM-X acquisitions.

11 For the glacier elevation change from 1980 to 1999, a difference map was constructed by  
12 common DEM differencing with TOPO DEM and SRTM C-band DEM (Bolch et al., 2011; Nuth  
13 and Kääb, 2011; Pieczonka et al., 2013; Wei et al., 2015a). Relative horizontal and vertical  
14 distortions between the two data sets, can be corrected by statistical approaches that based on the  
15 relationship between elevation difference and slope, aspect (Nuth and Kääb, 2011). Elevation  
16 differences in off-glacier regions were used to analyze the consistency of TOPO DEM and SRTM  
17 C-band DEM (Fig. 4). Outliers of elevation differences, usually around data gaps and near DEM  
18 edges, were omitted with values exceeding  $\pm 100\text{ m}$  (Berthier et al., 2010; Bolch et al., 2011). The  
19 vertical biases and horizontal displacements could be adjusted simultaneously using the  
20 substantial cosinusoidal relationship between standardized vertical bias and topographical  
21 parameters (slope and aspect). And the biases that caused by different spatial resolutions between  
22 DEMs, could be adjusted by the relationship between elevation differences and maximum  
23 curvatures (Gardelle et al., 2012a; Nuth and Kääb, 2011).

24 The penetration depth of SRTM C-band radar beam into snow and ice need to be considered  
25 for elevation changes of glacier surfaces (Berthier et al., 2006; Gardelle et al., 2012a; Pieczonka et  
26 al., 2013). Penetration depth can range from 0 to 10 m depending on a variety of parameters such  
27 as snow temperature, density and water content (Berthier et al., 2006; Dall et al., 2001). As a first  
28 approximation, the penetration depth of SRTM X-band radar beam is much smaller than C-band,  
29 the elevation difference between these two data sets can be considered as the penetration of SRTM  
30 C-band radar beam into snow and ice (Gardelle et al., 2012a). The elevation differences between  
31 SRTM C-band and X-band indicate that the penetration depth of the C-band averaged 1.24 m  
32 in the study area. The mean value of the SRTM C-band penetration over glaciers in Kangri  
33 Karpo Mountains is in agreement with Gardelle et al. (2013), who found penetration of 1.7 m  
34 in eastern Nyainqentanglha Mountains (named Hengduan Shan in Gardelle et al. (2013)).

#### 35 **4.4 Mass balance and error estimation**

36 In order to convert the derived surface elevation changes into the mass balance of glaciers, a  
37 density of ice/firn/snow should be considered. A value of  $900\text{ kg m}^{-3}$  was applied to assess the  
38 mass changes in water equivalent (w.e.) from elevation differences, and then adding an ice density  
39 uncertainty of  $17\text{ kg m}^{-3}$  (Gardner et al., 2013; Neckel et al., 2013b).

40 For the accuracy assessment of TOPO DEM and SRTM C-band DEM, the elevation product  
41 of Geoscience Laser Altimeter System (GLAS) carried on-board the Ice Cloud and Elevation  
42 Satellite (ICESat) was utilized in this study (Neckel et al., 2013a). All available GLAS elevation  
43 data for the study area were obtained from the National Snow and Ice Data Center (NSIDC)  
44 (release 634; product GLA 14). Because of the effect of clouds during the time of data acquisition,

1 some GLAS elevation data cannot represent the true altitude of ground surface. Outliers of  
 2 elevation difference between GLA 14 and multi-source of DEMs in off-glacier regions were  
 3 removed from the analysis with values exceeding  $\pm 100$  m. Compared to the GLAS elevation data,  
 4 a mean and standard deviation of  $2.74 \pm 1.73$  m and  $2.65 \pm 1.48$  m for TOPO DEM and SRTM  
 5 C-band DEM, respectively. Due to the GCPs that convert the unwrapped  
 6 TerraSAR-X/TanDEM-X interferogram into absolute heights was selected from the respective  
 7 off-glacier pixel locations in the SRTM C-band DEM, vertical bias of TerraSAR-X/TanDEM-X  
 8 DEM and GLA 14 is similar with the bias of SRTM C-band DEM and GLA 14.

9 For an error estimate of the derived surface elevation changes, the residual elevation  
 10 differences were estimated in off-glacier regions assuming that these areas did not change in  
 11 height between 1980 and 2014 and that elevations should be equal in TOPO DEM, SRTM C-band  
 12 DEM and TerraSAR-X/TanDEM-X DEM. The mean elevation difference (MED) over off-glacier  
 13 regions between the final difference maps was in the range of -1.42 to 0.75 m (Table 2). Because  
 14 averaging over larger regions reduces the errors, the standard deviation (STDV) over off-glacier  
 15 regions would probably overestimate the uncertainty for larger samples. Thus, the uncertainty can  
 16 be estimated by the standard error of the mean (SE):

$$SE = \frac{STDV}{\sqrt{N}} \quad (3)$$

17 where  $N$  is the number of the included pixels. To avoid the effect of autocorrelation,  
 18 de-correlation length of 600 m and 200 m was employed for difference maps that derived by  
 19 common DEM differencing and DInSAR (Bolch et al., 2011; Neckel et al., 2013a). Then, the  
 20 overall errors of the derived surface elevation changes can be estimated using SE and MED  
 21 over off-glacier regions:  
 22

$$\sigma = \sqrt{MED^2 + SE^2} \quad (4)$$

23 Finally, the root of sum of squares of the estimated errors of glacier area and surface  
 24 elevation changes, and ice density uncertainty of  $17 \text{ kg m}^{-3}$ , were used to estimate the overall  
 25 errors of mass balance (Neckel et al., 2013a).  
 26

## 27 **5 Results**

### 28 **5.1 Area change**

29 According to the 2015 inventory, the Kangri Karpo Mountains contain 1166 glaciers, with an area  
 30 of  $2048.50 \pm 48.65 \text{ km}^2$ , and the mean glacier size is  $1.76 \pm 0.04 \text{ km}^2$  (Fig. 5). The highest number  
 31 of glaciers can be found in the size class  $0.1\text{-}0.5 \text{ km}^2$ , whereas glaciers between  $1\text{-}5 \text{ km}^2$  cover the  
 32 largest area (Fig. 5A). Only two glaciers area larger than  $50 \text{ km}^2$ , the largest glacier is Yalong  
 33 Glacier and another is Xirinongpu Glacier, with glacier area of  $173.00 \pm 0.67 \text{ km}^2$  and  $90.28 \pm$   
 34  $0.23 \text{ km}^2$ , respectively. Glaciers area in Kangri Karpo Mountains present a normal hypsometry,  
 35 about 76.9% of glacier area lies in the 4500-5500 m elevation range. Azha Glacier is the glacier  
 36 with the lowest glacier tongue position, and the elevation of glacier tongue at 2551 m (Fig. 5B).  
 37 Median elevation of the glaciers in Kangri Karpo Mountains is situated at around 4852 m, 5215 m  
 38 for glaciers on the north slope and 4639 m on the south. This is consistent with the tendency of  
 39 equilibrium line altitude in southeast Tibetan Plateau (Su et al., 2014). The mean glacier surface  
 40 slope in the Kangri Karpo Mountains is  $24.1^\circ$  with most in the  $12\text{-}32^\circ$  range that accounts for 80.5%  
 41 of the glaciers and 85.4% of their area. Most glaciers have a SE, S or SW aspects, account for 59.2%  
 42 and 80.9% of glacier number and area, respectively.



1 Comparing the total area of all glaciers in 1980 with that in 2015, ice cover in the Kangri  
2 Karpo Mountains diminished by  $679.51 \pm 59.49 \text{ km}^2$  ( $24.9\% \pm 2.2\%$ ) or  $0.71\% \pm 0.06\% \text{ a}^{-1}$ . Small  
3 glaciers shrunk in area in larger percentage (Fig. 5C). Meanwhile, absolute area loss was higher  
4 for larger glaciers. Analysis of the glacier hypsography indicated that ice coverage disappeared  
5 completely below 2500 m, the highest absolute area loss occurred in the 4500–4700 m a.s.l.  
6 altitude range, and ice coverage remains almost unchanged above 5800 m. The average minimum  
7 elevation of the glaciers increased by 106 m, while median elevation rose about 56 m from 4796  
8 to 4852 m.

9 There was a slight tendency that the rate of glaciers shrinkage from 1980 – 2000 was lower  
10 than those from 2000 – 2015 in the detailed study area of Kangri Karpo Mountains (Table 3). In  
11 the period of 1980 – 2000, glacier area decreased by  $63.72 \pm 9.06 \text{ km}^2$  from its original  $784.60$   
12  $\text{km}^2$  ( $8.1\% \pm 1.2\%$ ) or  $0.41\% \pm 0.06\% \text{ a}^{-1}$ . Between 2000 and 2015, glaciers experienced a  
13 reduction of  $56.00 \pm 10.97 \text{ km}^2$  ( $7.8\% \pm 1.5\%$ ) or  $0.52\% \pm 0.10\% \text{ a}^{-1}$ . A detailed analysis of ten  
14 sample glaciers confirmed that all glaciers decreased continuously throughout all investigated  
15 periods (Table 4). Percentage area loss varied between 8.6% (WGI ID/GLIMS ID:  
16 5O291B0200/G097005E29155N, the smallest glacier area loss) and 20.9% (Parlung No. 10  
17 Glacier, the largest glacier area loss) from 1980 – 2015. The largest loss of absolute area reached  
18  $20.43 \text{ km}^2$  for Yalong Glacier, and lowest reached  $1.04 \text{ km}^2$  for Parlung No. 10 Glacier.

## 19 5.2 Length change

20 Comparing the termini of all glaciers, only nine glaciers advanced while others retreated in the  
21 Kangri Karpo Mountains from 1980 – 2015. The nine glaciers experienced a mean advance of  
22  $14.8 \text{ m a}^{-1}$ , and the length of centerlines increased between 103 m and 1547 m. The terminus  
23 elevation decrease of these advanced glaciers averaged at 191 m, varying between 34 m (the  
24 smallest lowering from 4796 m to 4762 m a.s.l. altitude) and 412 m (the largest one from 4362 m  
25 to 3949 m a.s.l. altitude) (Table 5). Based on different glacier size, slope and aspect, 86 glaciers  
26 were selected from all retreated glaciers to analyze the changes of length. These selected glaciers  
27 experienced a mean recession of 759 m ( $21.7 \text{ m a}^{-1}$ ) with smallest of 6 m and largest of 3956 m.

28 Similar to area change of the glaciers in the case study region, these glaciers have shown  
29 accelerated retreat during the two periods from 1980 – 2000 and from 2000 – 2015 as measured in  
30 glacier length (Table 6). Glaciers experienced a mean length reduction of  $21.0 \text{ m a}^{-1}$  (varying from  
31  $2.5 \text{ m a}^{-1}$  to  $104.2 \text{ m a}^{-1}$ ) in the period of 1980 – 2000 and  $22.6 \text{ m a}^{-1}$  from 2000 – 2015 (varied  
32 between  $1.3 \text{ m a}^{-1}$  and  $144.8 \text{ m a}^{-1}$ ). The recession of Yalong Glacier changed from  $78.0 \text{ m a}^{-1}$  in  
33 1980 – 2000 to  $13.6 \text{ m a}^{-1}$  in 2000 – 2014, while the average rates of retreat increased significantly  
34 for Azha Glacier in the two sub-periods of 1980 – 2000 and 2000 – 2015, with a mean recession of  
35  $11.3 \text{ m a}^{-1}$  and  $144.8 \text{ m a}^{-1}$ , respectively.

## 36 5.3 Mass balance

37 The average elevation change of the entire glacier surfaces in the case study area of Kangri Karpo  
38 Mountains was  $-17.46 \pm 0.54 \text{ m}$  from 1980 – 2014. The glaciers, with an area of  $788.28 \text{ km}^2$ , have  
39 experienced a mean thinning of  $0.51 \pm 0.09 \text{ m a}^{-1}$ , or mean mass loss of  $0.46 \pm 0.08 \text{ m w.e. a}^{-1}$ ,  
40 equivalent to an overall mass change of  $-13.76 \pm 0.43 \text{ Gt}$  for the case study area during 1980 –  
41 2014. Thinning of these glaciers has speeded up during the periods of 1980–2000 and 2000 – 2014.  
42 From 1980 – 2000, glaciers have thinned by  $5.30 \pm 0.77 \text{ m}$  on average, and experienced a mass  
43 loss of  $0.24 \pm 0.16 \text{ m w.e. a}^{-1}$ . Then a surface lowering of  $11.04 \pm 0.43 \text{ m}$  was found from 2000 –

1 2014, with a mass loss of  $0.71 \pm 0.10$  m w.e.  $a^{-1}$  (Fig. 6 and Table 7).

2 Heterogeneous glacier mass balance was presented in the detailed study area of Kangri Karpo  
3 Mountains during 1980 – 2014. Glaciers, with an area of  $471.05 \pm 3.03$  km<sup>2</sup> in the drainage basin  
4 of 5O282B, experienced greater mass deficit of  $0.51 \pm 0.22$  m w.e.  $a^{-1}$  from 1980 – 2014, and  
5 mean mass deficit of  $0.30 \pm 0.14$  m w.e.  $a^{-1}$  and  $0.76 \pm 0.22$  m w.e.  $a^{-1}$  during the periods of 1980 –  
6 2000 and 2000 – 2014, respectively. Mean mass deficit of  $0.39 \pm 0.11$  m w.e.  $a^{-1}$  in the drainage  
7 basin of 5O291B was smaller than those in 5O282B drainage basin during 1980 – 2014. Glaciers  
8 with an area of  $317.22 \pm 4.27$  km<sup>2</sup> in 5O291B drainage basin experienced accelerating mass  
9 deficit during the periods of 1980 – 2000 and 2000 – 2014, with mean mass deficit of  $0.13 \pm 0.16$   
10 m w.e.  $a^{-1}$  and  $0.63 \pm 0.04$  m w.e.  $a^{-1}$ .

11 Prominent thickening (elevation increase) was found on the termini of two glaciers on the  
12 southern slope of the Kangri Karpo Mountains (Fig. 6C, WGI: 5O291B0113 and 5O291B0117).  
13 There have 3.79 km<sup>2</sup> and 3.70 km<sup>2</sup> debris-covered areas on the two glaciers, account for 20.6%  
14 and 31.4% of individual glacier areas, respectively. Meanwhile, the lengths of debris-covered  
15 regions account for 69.4% and 63.3% of individual glacier lengths. Probably the effect of debris  
16 cover, the glacier termini of 5O291B0113 and 5O291B0117 remain stable between October 1980  
17 and October 2015.

## 18 **6 Discussion**

### 19 **6.1 Uncertainty**

20 The uncertainty of glacier outlines was caused by positional and processing errors associated  
21 with glacier delineation (Bolch et al., 2010a; Racoviteanu et al., 2009). Seasonal snow, cloud and  
22 debris cover complicated glacier mapping precisely (Paul et al., 2013). The accuracy of glacier  
23 outlines in this study was estimated by compare extracted results with independently digitized  
24 glacier outlines from high resolution aerial imagery at random locations. An uncertainty model  
25 was employed to assess accuracy estimated in this study (Pfeffer et al., 2014). The delineation  
26 uncertainty of glaciers in the Kangri Karpo Mountains in 2015 was about 24.33 km<sup>2</sup> using the  
27 uncertainty model, that is smaller than the uncertainty of 48.65 km<sup>2</sup> in this study. Main reason for  
28 this discrepancy is probably that the delineation uncertainty of glaciers have been overestimated in  
29 this study, especially in the area of debris-covered ice and exposed bedrock that surrounded by ice  
30 cover.

31 For the uncertainty of mass balance, the penetration depth of SRTM C-band radar beam into  
32 snow and ice was critical issue when SRTM DEM was employed for geodetic mass balance  
33 calculations. The penetration depth of SRTM C-band radar beam can be estimated by comparing  
34 the SRTM C-band with the SRTM X-band DEM (Gardelle et al., 2012a; Kääb et al., 2012).  
35 Previous studies indicated that the penetration depth decreases as temperature and water content of  
36 surface snow cover rise (Surdyk, 2002), and penetration depths at 10 GHz from 2.1 m to 4.7 m  
37 were measured in Antarctica (Davis and Poznyak, 1993). Glaciers in eastern Nyainqentanglha  
38 Mountains are predominantly monsoonal influenced and have more snow moisture and higher  
39 temperatures than the Antarctic ice sheet (Shi and Liu, 2000). Hence, the penetration correction is  
40 suitable under the assumption that the influence of slight penetration of the X-band is negligible.  
41 The mean SRTM C-band penetration was 1.24 m in Kangri Karpo Mountains, led to mass changes  
42 on average of  $+0.06$  m w.e.  $a^{-1}$  and  $-0.08$  m w.e.  $a^{-1}$  for the periods of 1980 – 2000 and 2000 –  
43 2014.

1 Another issue is the lack of information in several regions due to data voids in accumulation  
2 area. Different suitable assumptions or elevation changes in the accumulation regions were used to  
3 fill the data voids and to assess the impact on mass balance (Pieczonka et al., 2013; Shangguan et  
4 al., 2015). In this study, the information of elevation change exists in all altitudinal zones from  
5 2400 m to 6600 m a.s.l., and the area of data voids was too small (0.7% above 6000 m a.s.l. in  
6 area) to affect the mass balance significantly. Hence, data voids can be neglected when mass  
7 balance was estimated by all glaciers area in the detailed study area, average surface elevation  
8 change and ice density.

## 9 **6.2 Glacier change of area and length**

10 This study found ice cover in the Kangri Karpo Mountains diminished between 1980 and  
11 2014 of about  $0.71\% \pm 0.06\% \text{ a}^{-1}$ . In the period of 1980 – 2000, glacier area decreased by  $0.41\% \pm$   
12  $0.06\% \text{ a}^{-1}$  in the case study area, and then this value increased to  $0.52\% \pm 0.10\% \text{ a}^{-1}$  after 2000.  
13 Our result is in agreement with previous study, that found shrinkage of  $0.57\% \text{ a}^{-1}$  in the  
14 southeastern Tibetan Plateau from 1980-2001 (Yao et al., 2012a). The shrinkage rate of previous  
15 study is larger than our result slightly, main reason for that is probably the difference of glacier  
16 size. The mean glacier sizes are about  $2.07 \text{ km}^2$  and  $6.54 \text{ km}^2$  in the Kangri Karpo Mountains and  
17 in the detailed study area in 1980, and greater relative loss for smaller glaciers was found in this  
18 study and previous studies (Wei et al., 2014; Wu et al., 2016b).

19 Compared with the retreat of mountain glaciers in the western China, glaciers in Kangri  
20 Karpo Mountains have experienced extremely strong glacial retreat. The glacier retreat of about  
21  $0.71\% \text{ a}^{-1}$  is lower than that in Altay Mountains ( $0.75\% \text{ a}^{-1}$ ) (Yao et al., 2012b), but larger than that  
22 in other regions of western China, such as Tian Shan Mountains ( $0.22\% \text{ a}^{-1}$ ) (Wang et al., 2011),  
23 eastern Pamir ( $0.25\% \text{ a}^{-1}$ ) (Zhang et al., 2016b), wester Kunlun Mountains ( $0.09\% \text{ a}^{-1}$ ) (Bao et al.,  
24 2015), Qilian Mountains ( $0.47\% \text{ a}^{-1}$ ) (Sun et al., 2015), Tibetan Plateau interior area ( $0.26\% \text{ a}^{-1}$ )  
25 (Wei et al., 2014).

26 The location of glacier terminal is often measured by remote sensing and investigation in the  
27 field. Due to the differences in the periods studied and spatial scales, the length changes of glacier  
28 centerlines in this study are slower than previous studies, except for Azha Glacier (Liu et al., 2006;  
29 Yang et al., 2010; Yao et al., 2012a). The investigation of terminus variation on Parlung No. 10  
30 Glacier was surveyed from 2006 – 2008, the period of survey is too short to represent length  
31 change of glacier centerlines over long periods of time (Yang et al., 2010). Compared the length  
32 change of Azha Glacier in different periods,  $-56.1 \text{ m a}^{-1}$  from 1973 – 2005 (Yao et al., 2012a),  $-65$   
33  $\text{ m a}^{-1}$  from 1980 – 2006 (Yang et al., 2010) and  $-70 \text{ m a}^{-1}$  from 1980 – 2015 (this study), we can  
34 found that Azha Glacier have experienced greater retreat after 2000s than that before 2000s. The  
35 length change of Yalong Glacier from 1980 – 2000 in this study is similar with Liu et al. (2006),  
36 who found retreat of  $73 \text{ m a}^{-1}$  of Yalong Glacier between 1980 and 2001. And then the average rate  
37 of retreat decreased significantly for Yalong Glacier after 2000.

38 For advanced glaciers, the mean glacier size is about  $0.51 \text{ km}^2$  and mean glacier surface slope  
39 is about  $27.9^\circ$ ; most glaciers have an S or SW aspect, and mean accumulation area ratio (AAR) is  
40 51. Previous studies also found advanced glaciers in Kangri Karpo Mountains (Liu et al., 2006;  
41 Shi et al., 2006). Compared with the CGI2 and GAMDAM glacier inventory, the location of most  
42 glacier termini in 2000 are very close to that in 2014, indicated that glacier advanced mainly  
43 occurs before 2000. Due to the special geographic location and climate feature, the qualities of  
44 Landsat MSS/TM images are too low to identify glacier termini. Fortunately, two Landsat TM

1 scenes (LT51340401994189BKT00 and LT51340401988301BJC00) with high quality can be  
2 employed in this study. Compared the glacier termini that acquired from Landsat scenes, such as  
3 Glacier 5O282B0111 (Fig. 3B), glacier advanced mainly occurs before 1988, and glacier retreated  
4 continuously after that (Fig. 7). Main reason for this phenomenon is probably that the increase of  
5 high precipitation (Shi et al., 2006). Annual precipitation dataset from 1980 to 2012, collected  
6 from the three nearest meteorological stations (Bomi, Zuogong and Zayu), indicated that  
7 maximum precipitation (1153 mm in 1988) is 1.6 times the minimum precipitation (714 mm in  
8 1981) at Bomi (29°52'N, 95°46'E, 2736 m a.s.l.), maximum precipitation (683 mm in 1987) is 2.3  
9 times the minimum precipitation (302 mm in 1983) at Zuogong (29°40'N, 97°50'E, 3780 m a.s.l.),  
10 and maximum precipitation (1091 mm in 1988) is 1.7 times the minimum precipitation (624 mm  
11 in 1982) at Zayu (28°39'N, 97°28'E, 2423 m a.s.l.). Supposing that the precipitation fluctuation in  
12 high elevation glacier area had been consistent with that at the three nearest meteorological  
13 stations, the change of precipitation or glacier accumulation certainly have significant influence on  
14 terminus fluctuation of glaciers. Due to the complicated terrains, the accumulation of glaciers  
15 varies greatly, and the response of glacier movement is not quite the same, individual glaciers  
16 advanced during 1980 – 1988.

### 17 **6.3 Glacier thinning and mass balance**

18 A comparison of glacier thickness changes show that significant differences are found over  
19 eastern Nyainqentanglha Mountains. Using SRTM DEM and SPOT5 DEM (24 November 2011),  
20 glaciers experienced a mean thinning of  $0.39 \pm 0.16 \text{ m a}^{-1}$  in eastern Nyainqentanglha Mountains  
21 (named Hengduan Shan) (Gardelle et al., 2013). Based on ICESat and SRTM, Kääb et al. (2015),  
22 Neckel et al. (2014) and Gardner et al. (2013) acquired different results over the Kangri Karpo  
23 Mountains, with glacier thickness loss of  $1.34 \pm 0.29 \text{ m a}^{-1}$ ,  $0.81 \pm 0.32 \text{ m a}^{-1}$  and  $0.30 \pm 0.13 \text{ m}$   
24  $\text{a}^{-1}$  during 2003 to 2009, respectively. Using SRTM DEM and TerraSAR-X/TanDEM-X  
25 acquisitions (18 February 2014 and 13 March 2014), glaciers experienced a mean thinning of  $0.79 \pm$   
26  $0.11 \text{ m a}^{-1}$  in Kangri Karpo Mountains. At a first glance, the result of glacier thickness loss in this  
27 study is in agreement with Neckel et al. (2014), and has significant differences with Kääb et al.  
28 (2015). Main reason for this discrepancy is the different estimation of SRTM C-band penetration.  
29 An average SRTM C-band penetration of 1.24 m was used for Kangri Karpo Mountains that  
30 estimated from the difference of SRTM C-band and X-band DEMs (Gardelle et al., 2012a). While  
31 an average penetration of 8-10 m (7-9 m if based on the winter trends that might alternatively be  
32 assumed to reflect February conditions) was employed for eastern Nyainqentanglha Mountains  
33 (Kääb et al., 2015). Previous studies indicated that the penetration depth varies with temperature  
34 and water content (Surdyk, 2002), and penetration depths of SRTM C-band from 1.4 m to 3.4 m  
35 were estimated over the Pamir-Karakoram-Himalaya (Gardelle et al., 2013; Kääb et al., 2012).  
36 The characteristics of glaciers in eastern Nyainqentanglha Mountains are similar with that in  
37 eastern Himalaya (Shi et al., 2008b). Therefore, the penetration in this study is more suitable  
38 under the assumption that the penetrations in eastern Nyainqentanglha Mountains and eastern  
39 Himalaya are similar.

40 Field measurement of mass balance is the best indicator of glacier change. A monitoring  
41 program has been carried out on Parlung No. 4 Glacier (5O282B0004/G096920E29228N) and  
42 Parlung No. 10 Glacier (5O282B0010/G096904E29286N), both located on the northern slope of  
43 the Kangri Karpo Mountains. Large ice deficit were found on the two monitored glaciers at rates  
44 of  $-0.71 \text{ m w.e. a}^{-1}$  from May 2006 to May 2007 and  $-0.78 \text{ m w.e. a}^{-1}$  during 2005 – 2009,

1 respectively (Yang et al., 2008; Yao et al., 2012a). Based on SRTM DEM and  
2 TerraSAR-X/TanDEM-X acquisitions (18 February 2014), the two glaciers experienced large  
3 surface lowering from 2000 to 2014, with mean mass deficit of  $0.65 \pm 0.22$  m w.e.  $a^{-1}$  and  $0.67 \pm$   
4  $0.22$  m w.e.  $a^{-1}$ . The comparison between field measurements of mass balance and the result of this  
5 study indicated that there was high consistency of glacier mass deficit about Parlung No. 4 Glacier  
6 and Parlung No. 10 Glacier.

7 Interestingly is the bigger thinning on the debris-covered region of  $-0.99 \pm 0.09$  m  $a^{-1}$  on  
8 average than clean-ice region of  $-0.89 \pm 0.08$  m w.e.  $a^{-1}$  in the 2800 – 5300 m a.s.l. altitude range  
9 from 1980 – 2014 (Fig. 8). 2800 m a.s.l. was the lowest altitude of clean-ice region and 5300 m  
10 a.s.l. was the highest altitude of debris-covered region. Due to complex surface conditions, such as  
11 supraglacial lakes, ice cliffs and heterogeneity of debris cover, the mass loss patterns on the  
12 debris-covered tongue are complicated (Pellicciotti et al., 2015). It is generally believed that ice  
13 ablation rate is highly reduced with the thick debris-cover due to the insulation effect of debris.  
14 However, previous studies found that glacier ablation on debris-covered regions were greater than  
15 on the exposed ice regions, when debris thickness is less than critical thickness (Nakawo and  
16 Young, 1981; Pu et al., 2003; Ye et al., 2015; Zhang et al., 2011; Zhang et al., 2016a). The location  
17 of debris-covered regions, in the lower altitudes with higher temperature, and the development of  
18 supraglacial lakes and ice cliffs are probably the reasons for the larger mass loss on the  
19 debris-covered regions (Benn et al., 2012; Sakai and Fujita, 2010).

20 Overall, negative elevation changes were found in glacier tongue regions except for two  
21 glaciers in the southern slope of the Kangri Karpo Mountains (Fig. 6C). Compared the average  
22 elevation changes of the two glaciers tongue surface during 1980-2000 and 2000-2014, positive  
23 elevation changes were found between October 1980 and February 2000, and negative elevation  
24 changes were found after 2000. The two glaciers showed positive elevation changes at the termini,  
25 while elevation changes are unknown in accumulation area of the two glaciers due to data voids.  
26 This phenomenon could be interpreted as glacier surging (Cuffey and Paterson, 2010), or result  
27 from the increase of high precipitation (Shi et al., 2006).

#### 28 **6.4 Climatic considerations**

29 The climate in Kangri Karpo Mountains is characterized by the westerly in winter and the  
30 Indian monsoon in summer (Li et al., 1986). While the effects of westerly are weak in the study  
31 area due to the block of Tibetan Plateau. Hence, the accumulation on glaciers in Kangri Karpo  
32 Mountains is supplied by summer monsoon precipitation (Bolch et al., 2010a; Yao et al., 2012a).  
33 Previous studies indicated that the Tibetan Plateau has experienced an overall surface air warming  
34 since the mid-1950s (Duan et al., 2015; Li et al., 2010; Liu et al., 2008; Liu et al., 2009; Qin et al.,  
35 2009; Yang et al., 2014; Yao et al., 2012a; You et al., 2010). Different trend of average annual  
36 temperature results from different data in the southeastern TP. Based on temperature data from  
37 meteorological stations, the southeastern TP present the lowest warming rate (Duan et al., 2015),  
38 while the most warming rate was found from the MODIS land surface temperature (MODIS LST)  
39 in the southeastern TP (Yang et al., 2014), even decreasing trend of average annual temperature  
40 was found from the National Centers for Environmental Prediction/National Center for  
41 Atmospheric Research (NCEP/NCAR) Reanalysis data (You et al., 2010). The changes in air  
42 temperature were accompanied by the changes in precipitation due to variations in monsoonal  
43 activity. Based on the Global Precipitation Climatology Project (GPCP) data, precipitation  
44 decreased in the southeastern TP from 1979 to 2010 (Yao et al., 2012a). While positive trend of

1 annual precipitation was found from Chinese meteorological stations data in the southeastern TP,  
2 precipitation amount increased and the frequency of severely dry events decreased significantly  
3 (Li et al., 2010). Due to the ambiguous of climate change, the presented glacier changes and mass  
4 balance cannot be explained by the above summarized climate variations directly.

5 In order to analyze the response of glaciers to climate change, air temperature and  
6 precipitation datasets were collected from the China Meteorological Forcing Dataset (CMFD,  
7 1979.01.01 – 2012.12.31) (Chen et al., 2011; He and Yang, 2011), which produced by merging a  
8 variety of data sources, including meteorological station data, TRMM satellite precipitation  
9 analysis data, GEWEX-SRB downward shortwave radiation data and GLDAS data  
10 (<http://westdc.westgis.ac.cn/data/7a35329c-c53f-4267-aa07-e0037d913a21>). The horizontal  
11 distributions of surface temperature change and precipitation change from May to September  
12 derived from the CMFD data was shown in Fig. 9. It is clear that warming is a dominant  
13 phenomenon in the southeastern TP during recent decades. The warming rate on the northern  
14 slope of the Kangri Karpo Mountains is larger than that on the southern slope slightly. The law of  
15 precipitation change was inconsistent that an increasing trend was present in much of Kangri  
16 Karpo Mountains, but a decreasing trend in the eastern Kangri Karpo Mountains. The changes of  
17 air temperature and precipitation are confirmed by three nearest meteorological stations datasets,  
18 which is Bomi (2736 m a.s.l.), Zuogong (3780 m a.s.l.) and Zayu (2423 m a.s.l.) (Liu et al., 2006;  
19 Yang et al., 2010). The air temperature at the three meteorological stations increased slightly from  
20 1980-2000, and then it increased significantly after 2000. Despite large inter-annual fluctuation of  
21 precipitation, statistically significant trends are not evident at the three stations (Wu et al., 2016a;  
22 Yang et al., 2010).

23 For the rainfall-variation law, a slightly increasing trend was present in the detailed study  
24 area of Kangri Karpo Mountains during 1980 – 2012. The increase of precipitation results in more  
25 glacier accumulation, while glaciers have experienced an intense mass deficit in the detailed study  
26 area of Kangri Karpo Mountains. It can be concluded that other factors are playing a more  
27 important role in glacier mass deficit. For the change of temperature, warming was present in the  
28 detailed study area of Kangri Karpo Mountains during 1980 – 2012. And the warming rate on the  
29 northern slope of the Kangri Karpo Mountains is larger than that on the southern slope slightly. A  
30 small warming rate was present from 1980 – 2000, and increased to large warming rate thereafter.  
31 This is consistent with the tendency of glaciers change. Glaciers have experienced an intense area  
32 reduction and mass deficit in the Kangri Karpo Mountains, and mean mass deficit in the drainage  
33 basin of 5O282B (located on the northern slope of detailed study area) was larger than that in the  
34 drainage basin of 5O291B (located on the southern slope of detailed study area) during 1980 –  
35 2014. Meanwhile, the rate of glaciers shrinkage and mass loss from 1980 – 2000 were lower than  
36 those from 2000 – 2015. Hence, glaciers change in the Kangri Karpo Mountains can be attributed  
37 to climate warming.

## 38 **7 Conslusions**

39 This study estimated glacier area, glacier length, surface elevation and mass balance of the Kangri  
40 Karpo Mountains for the period of 1980 – 2015 based on Topographic Maps, Landsat images,  
41 SRTM and TerraSAR-X/TanDEM-X acquisitions.

42 Our results show that the Kangri Karpo Mountains contain 1166 glaciers, with an area of  
43  $2048.50 \pm 48.65 \text{ km}^2$  in 2015. Ice cover in the Kangri Karpo Mountains diminished by  $679.51 \pm$   
44  $59.49 \text{ km}^2$  ( $24.9\% \pm 2.2\%$ ) or  $0.71\% \pm 0.06\% \text{ a}^{-1}$  from 1980 – 2015. Comparing the terminal of all

1 glaciers, only nine glaciers advanced while others retreated in the Kangri Karpo Mountains from  
2 1980 – 2015. Compared with the retreat of mountain glaciers in the western China, glaciers in  
3 Kangri Karpo Mountains have experienced extremely strong glacial retreat.

4 The average elevation change of the entire glacier surfaces in the detailed study area of  
5 Kangri Karpo Mountains was  $-0.51 \pm 0.09 \text{ m a}^{-1}$ , or mean mass deficit of  $0.46 \pm 0.08 \text{ m w.e. a}^{-1}$   
6 from 1980-2014. Heterogeneous glacier mass balance was presented in the Kangri Karpo  
7 Mountains during 1980-2014. The comparison between filed measurements of mass balance and  
8 the result of this study indicated that there was high consistency of glacier mass loss about Parlung  
9 No. 4 Glacier and Parlung No. 10 Glacier. Geodetic mass balance measurements in the detailed  
10 study area of Kangri Karpo Mountains revealed that the debris-covered regions exhibit higher  
11 thinning rates than the clean-ice region on average obviously, with an average of  $-0.99 \pm 0.09 \text{ m}$   
12  $\text{a}^{-1}$  ( $-0.89 \pm 0.08 \text{ m w.e. a}^{-1}$ ) from 1980 – 2014. There was a slight tendency that the rate of glaciers  
13 shrinkage and mass loss from 1980 – 2000 were lower than those from 2000 – 2015 in the detailed  
14 study area of Kangri Karpo Mountains.

15  
16  
17  
18 *Acknowledgements.* This work was supported by the fundamental program from the Ministry of Science and  
19 Technology of China (MOST) (Grant No. 2013FY111400), the National Natural Science Foundation of China  
20 (Grant No. 41190084) and the International Partnership Program of Chinese Academy of Sciences (Grant No.  
21 131C11KYSB20160061). Landsat images are from the U. S. Geological Survey and NASA. The GAMDAM  
22 glacier inventory is from Dr. A. Sakai . The first and second glacier inventories were provided by an  
23 immediate past MOST project (2006FY110200). The China Meteorological Forcing Dataset (CMFD) is  
24 from Cold and Arid Regions Science Data Center at Lanzhou. All SAR processing was done with the GAMMA  
25 SAR and interferometric processing software.

## 26 27 28 29 **References**

- 30  
31 Arendt, A., Bliss, A., Bolch, T., Cogley, J. G., and Gardner, A. S.: Randolph Glacier Inventory - A  
32 dataset of global glacier outlines: Version 5.0. University of Colorado, National Snow and Ice Data  
33 Center (NSIDC), Global Land Ice Measurements from Space (GLIMS), Boulder, CO, USA. Available  
34 online at: [http://www.glims.org/RGI/00\\_rgi50\\_TechnicalNote.pdf](http://www.glims.org/RGI/00_rgi50_TechnicalNote.pdf), 2015.
- 35 Bao, W., Liu, S., Wei, J., and Guo, W.: Glacier changes during the past 40 years in the West Kunlun  
36 Shan, *Journal of Mountain Science*, 12, 344-357, 2015.
- 37 Benn, D. I., Bolch, T., Hands, K., Gulley, J., Luckman, A., Nicholson, L. I., Quincey, D., Thompson, S.,  
38 Toumi, R., and Wiseman, S.: Response of debris-covered glaciers in the Mount Everest region to recent  
39 warming, and implications for outburst flood hazards, *Earth-Science Reviews*, 114, 156-174, 2012.
- 40 Berthier, E., Arnaud, Y., Vincent, C., and Remy, F.: Biases of SRTM in high - mountain areas:  
41 Implications for the monitoring of glacier volume changes, *Geophysical Research Letters*, 33, 2006.
- 42 Berthier, E., Schiefer, E., Clarke, G. K., Menounos, B., and R  ny, F.: Contribution of Alaskan glaciers  
43 to sea-level rise derived from satellite imagery, *Nature Geoscience*, 3, 92-95, 2010.
- 44 Bolch, T., Menounos, B., and Wheate, R.: Landsat-based inventory of glaciers in western Canada,

1 1985–2005, *Remote Sensing of Environment*, 114, 127-137, 2010a.

2 Bolch, T., Pieczonka, T., and Benn, D.: Multi-decadal mass loss of glaciers in the Everest area (Nepal  
3 Himalaya) derived from stereo imagery, *The Cryosphere*, 5, 349-358, 2011.

4 Bolch, T., Yao, T., Kang, S., Buchroithner, M., Scherer, D., Maussion, F., Huintjes, E., and Schneider,  
5 C.: A glacier inventory for the western Nyainqentanglha Range and the Nam Co Basin, Tibet, and  
6 glacier changes 1976–2009, *The Cryosphere*, 4, 419-433, 2010b.

7 Chen, Y., Yang, K., He, J., Qin, J., Shi, J., Du, J., and He, Q.: Improving land surface temperature  
8 modeling for dry land of China, *Journal of Geophysical Research Atmospheres*, 116, 999-1010, 2011.

9 Cuffey, K. M. and Paterson, W. S. B.: *The Physics of Glaciers* (Fourth Edition),  
10 Butterworth-Heinemann/Elsevier, Burlington, MA, USA and Oxford, UK, 2010.

11 Dall, J., Madsen, S. N., Keller, K., and Forsberg, R.: Topography and penetration of the Greenland ice  
12 sheet measured with airborne SAR interferometry, *Geophysical Research Letters*, 28, 1703-1706, 2001.

13 Davis, C. H. and Poznyak, V. I.: The depth of penetration in Antarctic firm at 10 GHz, *IEEE*  
14 *Transactions on Geoscience & Remote Sensing*, 31, 1107-1111, 1993.

15 Duan, J., Li, L., and Fang, Y.: Seasonal spatial heterogeneity of warming rates on the Tibetan Plateau  
16 over the past 30 years, *Scientific Reports*, 5, 2015.

17 Farr, T. G., Rosen, P. A., Caro, E., Crippen, R., Duren, R., Hensley, S., Kobrick, M., Paller, M.,  
18 Rodriguez, E., Roth, L., Seal, D., Shaffer, S., Shimada, J., Umland, J., Werner, M., Oskin, M., Burbank,  
19 D., and Alsdorf, D.: The shuttle radar topography mission, *Reviews of geophysics*, 45, 2007.

20 Gardelle, J., Berthier, E., and Arnaud, Y.: Impact of resolution and radar penetration on glacier  
21 elevation changes computed from DEM differencing, *Journal of Glaciology*, 58, 419-422, 2012a.

22 Gardelle, J., Berthier, E., and Arnaud, Y.: Slight mass gain of Karakoram glaciers in the early  
23 twenty-first century, *Nature geoscience*, 5, 322-325, 2012b.

24 Gardelle, J., Berthier, E., Arnaud, Y., and Kaab, A.: Region-wide glacier mass balances over the  
25 Pamir-Karakoram-Himalaya during 1999-2011, *Cryosphere*, 7, 1885-1886, 2013.

26 Gardner, A. S., Moholdt, G., Cogley, J. G., Wouters, B., Arendt, A. A., Wahr, J., Berthier, E., Hock, R.,  
27 Pfeffer, W. T., and Kaser, G.: A reconciled estimate of glacier contributions to sea level rise: 2003 to  
28 2009, *Science*, 340, 852-857, 2013.

29 GB/T12343.1: Compilation specifications for national fundamental scale maps —Part 1: compilation  
30 specifications for 1:25000/1:50000/1:100000 topographic maps., General Administration of Quality  
31 Supervision, Inspection and Quarantine, Beijing, 2008.

32 Goldstein, R. M. and Werner, C. L.: Radar interferogram filtering for geophysical applications,  
33 *Geophysical Research Letters*, 25, 4035-4038, 1998.

34 Guo, W., Liu, S., Xu, J., Wu, L., Shangguan, D., Yao, X., Wei, J., Bao, W., Yu, P., and Liu, Q.: The  
35 second Chinese glacier inventory: data, methods and results, *Journal of Glaciology*, 61, 357-372, 2015.

36 Guo, W., Liu, S., Yu, P., and Xu, J.: Automatic extraction of ridgelines using on drainage boundaries  
37 and aspect difference, *Science of Surveying and Mapping*, 36, 210-213, 2011.

38 He, J. and Yang, K.: *China Meteorological Forcing Dataset*. Center, C. a. A. R. S. D., Lanzhou, 2011.

39 Immerzeel, W. W., Van Beek, L. P., and Bierkens, M. F.: Climate change will affect the Asian water  
40 towers, *Science*, 328, 1382-1385, 2010.

41 IPCC: Summary for policymakers. In: *Climate change 2013: The physical science basis. Contribution*  
42 *of Working Group I to the Fifth Assessment Report of the Intergovernmental Panel on Climate*  
43 *Change.*, Cambridge University Press Cambridge, UK and New York, NY, USA, 2013.

44 K ääb, A., Berthier, E., Nuth, C., Gardelle, J., and Arnaud, Y.: Contrasting patterns of early



1 twenty-first-century glacier mass change in the Himalayas, *Nature*, 488, 495-498, 2012.

2 K ääb, A., Treichler, D., Nuth, C., and Berthier, E.: Brief Communication: Contending estimates of  
3 2003–2008 glacier mass balance over the Pamir–Karakoram–Himalaya, *The Cryosphere*, 9, 557-564,  
4 2015.

5 Kienholz, C., Rich, J., Arendt, A., and Hock, R.: A new method for deriving glacier centerlines applied  
6 to glaciers in Alaska and northwest Canada, *The Cryosphere*, 8, 503-519, 2014.

7 Koblet, T., G ärtnerRoer, I., Zemp, M., and Jansson, P.: Reanalysis of multi-temporal aerial images of  
8 Storglaci ären, Sweden (1959–99) – Part 1: Determination of length, area, and volume changes,  
9 *Cryosphere*, 4, 333-343, 2010.

10 Krieger, G., Moreira, A., Fiedler, H., and Hajnsek, I.: TanDEM-X: A Satellite Formation for  
11 High-Resolution SAR Interferometry, *Geoscience and Remote Sensing, IEEE Transactions on*, 45,  
12 3317-3341, 2007.

13 Le Bris, R. and Paul, F.: An automatic method to create flow lines for determination of glacier length: A  
14 pilot study with Alaskan glaciers, *Computers & Geosciences*, 52, 234-245, 2013.

15 Leclercq, P. W., Oerlemans, J., Basagic, H. J., Bushueva, I., Cook, A., and Le Bris, R.: A data set of  
16 worldwide glacier length fluctuations, *The Cryosphere*, 8, 659-672, 2014.

17 Li, J., Zhen, B., and Yang, X.: *The glaciers of Xizang (Tibet)*, Science Press, Chinese Academy of  
18 Sciences, Beijing, 1986.

19 Li, L., Yang, S., Wang, Z., Zhu, X., and Tang, H.: Evidence of warming and wetting climate over the  
20 Qinghai-Tibet Plateau, *Arctic Antarctic & Alpine Research*, 42, 449-457, 2010.

21 Li, X., Cheng, G., Jin, H., Kang, E., Che, T., Jin, R., Wu, L., Nan, Z., Wang, J., and Shen, Y.:  
22 Cryospheric change in China, *Global and Planetary Change*, 62, 210-218, 2008.

23 Li, X., Yang, T., and Ji, Q.: Study on Glacier Variations in the Gangrigabu Range, *Research of Soil and*  
24 *Water Conservation*, 21, 233-237, 2014.

25 Liu, S., Shangguan, D., Ding, Y., Han, H., Xie, C., Zhang, Y., Li, J., Wang, J., and Li, G.: Glacier  
26 changes during the past century in the Gangrigabu mountains, southeast Qinghai–Xizang (Tibetan)  
27 Plateau, China, *Annals of Glaciology*, 43, 187-193, 2006.

28 Liu, W., Guo, Q., and Wang, Y.: Temporal-spatial climate change in the last 35 years in Tibet and its  
29 geo-environmental consequences, *Environmental geology*, 54, 1747-1754, 2008.

30 Liu, X., Cheng, Z., Yan, L., and Yin, Z.-Y.: Elevation dependency of recent and future minimum  
31 surface air temperature trends in the Tibetan Plateau and its surroundings, *Global and Planetary Change*,  
32 68, 164-174, 2009.

33 Mi, D., Xie, Z., Luo, R., and Feng, Q.: *Glacier inventory of China XI. The Ganga Drainage basin.* ,  
34 Xi'an Cartographic Publishing House, Xi'an, 2002.

35 Nakawo, M. and Young, G. J.: Field Experiments to Determine the Effect of a Debris Layer on  
36 Ablation of Glacier Ice, *Annals of Glaciology*, 2, 85-91, 1981.

37 Neckel, N., Braun, A., Kropáček, J., and Hochschild, V.: Recent mass balance of Purogangri ice cap,  
38 central Tibetan Plateau, by means of differential X-band SAR interferometry, *Cryosphere*, 7,  
39 1623-1633, 2013a.

40 Neckel, N., Braun, A., Kropáček, J., and Hochschild, V.: Recent mass balance of the Purogangri Ice  
41 Cap, central Tibetan Plateau, by means of differential X-band SAR interferometry, *Cryosphere*, 7,  
42 1623-1633, 2013b.

43 Neckel, N., Kropáček, J., Bolch, T., and Hochschild, V.: Glacier mass changes on the Tibetan Plateau  
44 2003–2009 derived from ICESat laser altimetry measurements, *Environmental research letters*, 9,

1 014009, 2014.

2 Nuimura, T., Sakai, A., Taniguchi, K., Nagai, H., Lamsal, D., Tsutaki, S., Kozawa, A., Hoshina, Y.,  
3 Takenaka, S., and Omiya, S.: The GAMDAM Glacier Inventory: a quality controlled inventory of  
4 Asian glaciers, *Cryosphere*, 9, 849-864, 2015.

5 Nuth, C. and Kääb, A.: Co-registration and bias corrections of satellite elevation data sets for  
6 quantifying glacier thickness change, *The Cryosphere*, 5, 271-290, 2011.

7 Oerlemans, J.: Quantifying global warming from the retreat of glaciers, *Science*, 264, 243-244, 1994.

8 Paul, F., Barrand, N. E., Baumann, S., Berthier, E., Bolch, T., Casey, K., Frey, H., Joshi, S. P.,  
9 Konovalov, V., and Bris, R. L.: On the accuracy of glacier outlines derived from remote-sensing data,  
10 *Annals of Glaciology*, 54, 171-182, 2013.

11 Paul, F., Barry, R. G., Cogley, J. G., Frey, H., Haeberli, W., Ohmura, A., Ommanney, C. S. L., Raup, B.,  
12 Rivera, A., and Zemp, M.: Recommendations for the compilation of glacier inventory data from digital  
13 sources, *Annals of Glaciology*, 50, 119-126, 2009.

14 Paul, F. and Haeberli, W.: Spatial variability of glacier elevation changes in the Swiss Alps obtained  
15 from two digital elevation models, *Geophysical Research Letters*, 35, 189-203, 2008.

16 Paul, F., Kaeae, A., and Maisch, M.: Comparison of TM Derived Glacier Areas With Higher  
17 Resolution Data Sets, *EARSel eProceedings 2*, 2, 15-21, 2003.

18 Paul, F. and Svoboda, F.: A new glacier inventory on southern Baffin Island, Canada, from ASTER data:  
19 II. Data analysis, glacier change and applications, *Annals of Glaciology*, volume 50, 22-31, 2010.

20 Pellicciotti, F., Stephan, C., Miles, E., Herreid, S., Immerzeel, W. W., and Bolch, T.: Mass-balance  
21 changes of the debris-covered glaciers in the Langtang Himal, Nepal, from 1974 to 1999, *Journal of*  
22 *Glaciology*, 61, 373-386, 2015.

23 Pfeffer, W. T., Arendt, A. A., Bliss, A., Bolch, T., Cogley, J. G., Gardner, A. S., Hagen, J. O., Hock, R.,  
24 Kaser, G., and Kienholz, C.: The Randolph Glacier Inventory: a globally complete inventory of glaciers,  
25 *Journal of Glaciology*, 60, 537-552, 2014.

26 Pieczonka, T., Tobias, B., Wei, J., and Liu, S.: Heterogeneous mass loss of glaciers in the Aksu-Tarim  
27 Catchment (Central Tien Shan) revealed by 1976 KH-9 Hexagon and 2009 SPOT-5 stereo imagery,  
28 *Remote Sensing of Environment*, 130, 233-244, 2013.

29 Pu, J., Yao, T., and Duan, K.: An observation on surface ablation on the Yangbark glacier in the  
30 Muztagata Ata, China, *Journal of Glaciology & Geocryology*, 25, 680-684, 2003.

31 Qin, J., Yang, K., Liang, S., and Guo, X.: The altitudinal dependence of recent rapid warming over the  
32 Tibetan Plateau, *Climatic Change*, 97, 321-327, 2009.

33 Rabus, B., Eineder, M., Roth, A., and Bamler, R.: The shuttle radar topography mission—a new class  
34 of digital elevation models acquired by spaceborne radar, *Isprs Journal of Photogrammetry & Remote*  
35 *Sensing*, 57, 241-262, 2003.

36 Racoviteanu, A. E., Paul, F., Raup, B., Khalsa, S. J. S., and Armstrong, R.: Challenges and  
37 recommendations in mapping of glacier parameters from space: results of the 2008 Global Land Ice  
38 Measurements from Space (GLIMS) workshop, Boulder, Colorado, USA, *Annals of Glaciology*, 50,  
39 53-69, 2009.

40 Rosen, P. A., Hensley, S., Joughin, I. R., Li, F. K., Madsen, S. N., Rodriguez, E., and Goldstein, R. M.:  
41 Synthetic aperture radar interferometry, *Proceedings of the IEEE*, 88, 333-382, 2000.

42 Sakai, A. and Fujita, K.: Formation conditions of supraglacial lakes on debris-covered glaciers in the  
43 Himalaya, *Journal of Glaciology*, 56, 177-181, 2010.

44 Shanguan, D., Liu, S., Ding, Y., Zhang, Y., Li, J., Li, X., and Wu, Z.: Changes in the elevation and

1 extent of two glaciers along the Yanglonghe river, Qilian Shan, China, *Journal of Glaciology*, 56,  
2 309-317, 2010.

3 Shangguan, D. H., Bolch, T., Ding, Y. J., Kröhnert, M., Pieczonka, T., Wetzel, H. U., and Liu, S. Y.:  
4 Mass changes of Southern and Northern Inylchek Glacier, Central Tian Shan, Kyrgyzstan, during  
5 &sim;1975 and 2007 derived from remote sensing data, *Cryosphere*, 9, 703-717, 2015.

6 Shi, Y., Huang, M., and Ren, B.: An introduction to the glaciers in China, Science Press, Beijing,  
7 1988.

8 Shi, Y., Huang, M., Yao, T., and He, Y.: *Glaciers and Related Environments in China*, Science Press,  
9 2008a.

10 Shi, Y., Liu, C., Wang, Z., Liu, S., and Ye, B.: *Concise glacier inventory of China*, Shanghai Popular  
11 Science Press, 2008b.

12 Shi, Y. and Liu, S.: Estimation on the response of glaciers in China to the global warming in the 21st  
13 century, *Chinese Science Bulletin*, 45, 668-672, 2000.

14 Shi, Y., Liu, S., Shangguan, D., Li, D., Ye, B., and Shen, Y.: Two peculiar phenomena of climatic and  
15 glacial variations in the Tibetan Plateau, *Advances in Climate Change Research*, 2, 154-160, 2006.

16 Su, Z., Zhao, J., and Zheng, B.: Distribution and features of the glaciers' ELAs and the decrease of  
17 ELAs during the Last Glaciation in China, *Journal of Glaciology and Geocryology*, 36, 9-19, 2014.

18 Sun, M., Liu, S., Yao, X., Guo, W., and Xu, J.: Glacier changes in the Qilian Mountains in the past half  
19 century: Based on the revised First and Second Chinese Glacier Inventory, *ACTA GEOGRAPHICA  
20 SINICA*, 70, 1402-1414, 2015.

21 Surdyk, S.: Using microwave brightness temperature to detect short-term surface air temperature  
22 changes in Antarctica: An analytical approach, *Remote Sensing of Environment*, 80, 256-271, 2002.

23 Wang, S., Zhang, M., Li, Z., Wang, F., Li, H., Li, Y., and Huang, X.: Response of glacier area variation  
24 to climate change in Chinese Tianshan Mountains in the past 50 years, *ACTA GEOGRAPHICA  
25 SINICA*, 66, 38-46, 2011.

26 Wei, J., Liu, S., Guo, W., Xu, J., Bao, W., and Shangguan, D.: Changes in glacier volume in the north  
27 bank of the Bangong Co Basin from 1968 to 2007 based on historical topographic maps, SRTM, and  
28 ASTER stereo images, *Arctic, Antarctic, and Alpine Research*, 47, 301-311, 2015a.

29 Wei, J., Liu, S., Guo, W., Yao, X., Xu, J., Bao, W., and Jiang, Z.: Surface-area changes of glaciers in the  
30 Tibetan Plateau interior area since the 1970s using recent Landsat images and historical maps, *Annals  
31 of Glaciology*, 55, 213-222, 2014.

32 Wei, J., Liu, S., Xu, J., Guo, W., Bao, W., Shangguan, D., and Jiang, Z.: Mass loss from glaciers in the  
33 Chinese Altai Mountains between 1959 and 2008 revealed based on historical maps, SRTM, and  
34 ASTER images, *Journal of Mountain Science*, 12, 330-343, 2015b.

35 Werner, C., Wegmüller, U., Strozzi, T., and Wiesmann, A.: *Gamma SAR and interferometric processing  
36 software*, 2000, 1620.

37 Wu, K., Liu, S., Bao, W., and Wang, R.: Monitoring Glacier Change Based on Remote Sensing in the  
38 Gangrigabu Range, Southeast Tibetan Plateau, From 1980-2015, *Journal of Glaciology and  
39 Geocryology*, 2016a. 2016a.

40 Wu, K., Liu, S., Guo, W., Wei, J., Xu, J., Bao, W., and Yao, X.: Glacier change in the western  
41 Nyainqentanglha Range, Tibetan Plateau using historical maps and Landsat imagery: 1970-2014,  
42 *Journal of Mountain Science*, 13, 1358-1374, 2016b.

43 Xu, J., Liu, S., Zhang, S., Guo, W., and Wang, J.: Recent changes in glacial area and volume on  
44 Tuanjiefeng peak region of Qilian Mountains, China, *PLoS One*, 8, e70574, 2013.

1 Yang, K., Wu, H., Qin, J., Lin, C., Tang, W., and Chen, Y.: Recent climate changes over the Tibetan  
2 Plateau and their impacts on energy and water cycle: A review, *Global & Planetary Change*, 112, 79-91,  
3 2014.

4 Yang, W., Yao, T., Xu, B., Ma, L., Wang, Z., and Wan, M.: Characteristics of recent temperate glacier  
5 fluctuations in the Parlung Zangbo River basin, southeast Tibetan Plateau, *Chinese Science Bulletin*, 55,  
6 2097-2102, 2010.

7 Yang, W., Yao, T. D., Xu, B. Q., Wu, G. J., Ma, L. L., and Xin, X. D.: Quick ice mass loss and abrupt  
8 retreat of the maritime glaciers in the Kangri Karpo Mountains, southeast Tibetan Plateau, *Chinese  
9 Science Bulletin*, 53, 2547-2551, 2008.

10 Yao, T., Thompson, L., Yang, W., Yu, W., Gao, Y., Guo, X., Yang, X., Duan, K., Zhao, H., and Xu, B.:  
11 Different glacier status with atmospheric circulations in Tibetan Plateau and surroundings, *Nature  
12 Climate Change*, 2, 663-667, 2012a.

13 Yao, X., Liu, S., Guo, W., Huai, B., Sun, M., and Xu, J.: Glacier change of Altay Mountain in China  
14 from 1960 to 2009--Based on the Second Glacier Inventory of China, *Journal of Natural Resources*, 27,  
15 1734-1745, 2012b.

16 Yao, X., Liu, S., zhu, Y., Gong, P., An, L., and Li, X.: Design and implementation of an automatic  
17 method for deriving glacier centerlines based on GIS, *Journal of Glaciology and Geocryology*, 37,  
18 1563-1570, 2015.

19 Ye, Q., Bolch, T., Naruse, R., Wang, Y., Zong, J., Wang, Z., Zhao, R., Yang, D., and Kang, S.: Glacier  
20 mass changes in Rongbuk catchment on Mt. Qomolangma from 1974 to 2006 based on topographic  
21 maps and ALOS PRISM data, *Journal of Hydrology*, 530, 273-280, 2015.

22 You, Q., Kang, S., Pepin, N., Flügel, W.-A., Yan, Y., Behrawan, H., and Huang, J.: Relationship  
23 between temperature trend magnitude, elevation and mean temperature in the Tibetan Plateau from  
24 homogenized surface stations and reanalysis data, *Global and Planetary Change*, 71, 124-133, 2010.

25 Zhang, Y., Fujita, K., Liu, S., Liu, Q., and Nuimura, T.: Distribution of debris thickness and its effect on  
26 ice melt at Hailuogou glacier, southeastern Tibetan Plateau, using in situ surveys and ASTER imagery,  
27 *Journal of Glaciology*, 57, 1147-1157, 2011.

28 Zhang, Z., Liu, S., Wei, J., Xu, J., Guo, W., Bao, W., and Jiang, Z.: Mass Change of Glaciers in Muztag  
29 Ata-Kongur Tagh, Eastern Pamir, China from 1971/76 to 2013/14 as Derived from Remote Sensing  
30 Data, *PloS one*, 11, 2016a.

31 Zhang, Z., Xu, J.-l., Liu, S.-y., Guo, W.-q., Wei, J.-f., and Feng, T.: Glacier changes since the early  
32 1960s, eastern Pamir, China, *Journal of Mountain Science*, 13, 276-291, 2016b.

33 Zwally, H. J., Jun, L., Brenner, A. C., Beckley, M., Cornejo, H. G., DiMARZIO, J., Giovinetto, M. B.,  
34 Neumann, T. A., Robbins, J., and Saba, J. L.: Greenland ice sheet mass balance: distribution of  
35 increased mass loss with climate warming; 2003–07 versus 1992–2002, *Journal of Glaciology*, 57,  
36 88-102, 2011.

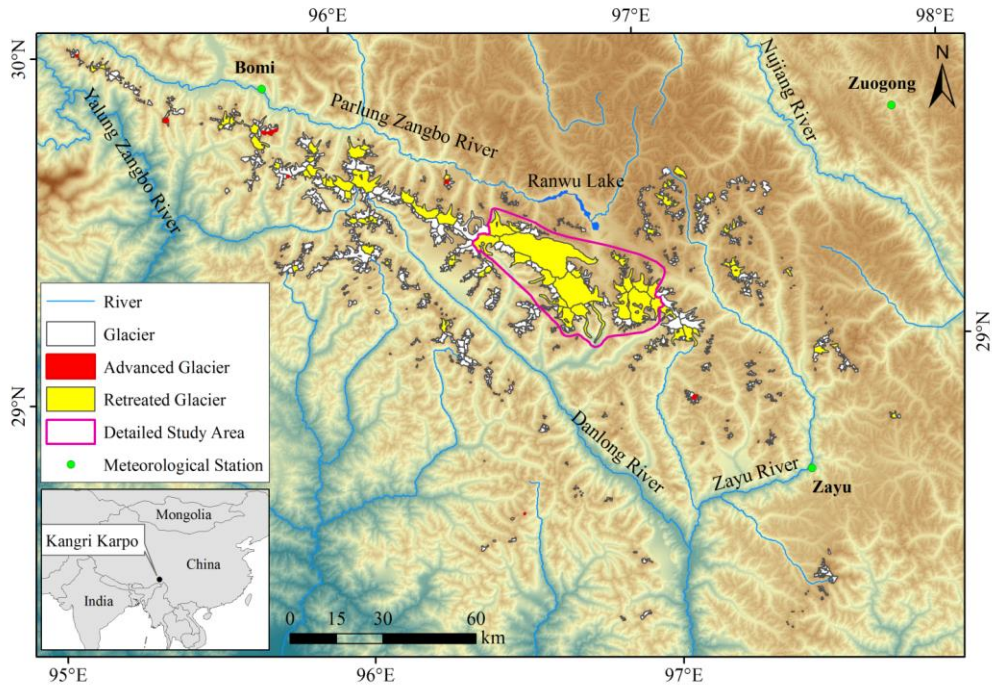

1

2 Figure 1. Overview of study area and glacier distribution, including the locations of the detailed  
 3 study area and meteorological stations. 96 glaciers were selected to generate centerlines and  
 4 calculate length change, and then be distinguished into advanced glaciers and retreated glaciers.

5

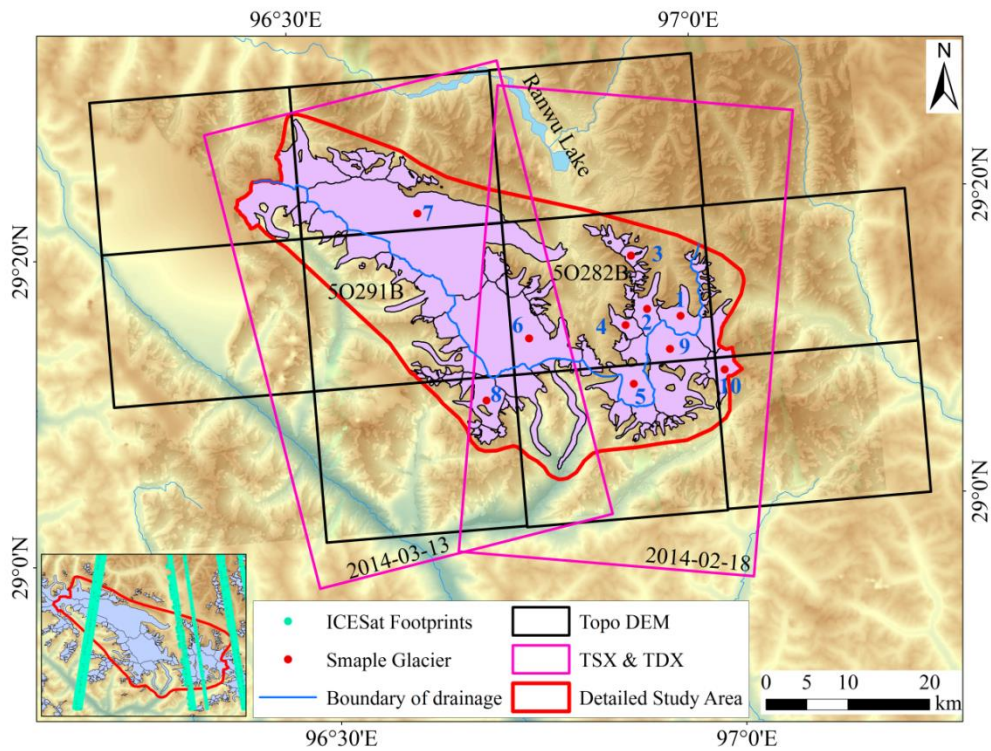

6

7 Figure 2. Location of the detailed study area, and distribution of TOPO DEMs, TSX/TDX acquisitions  
 8 and ICESat footprints. Numbers indicate specific sample glaciers. 50282B and 50291B indicate the  
 9 drainage basins, where located on north slope and south slope of the detailed study area.

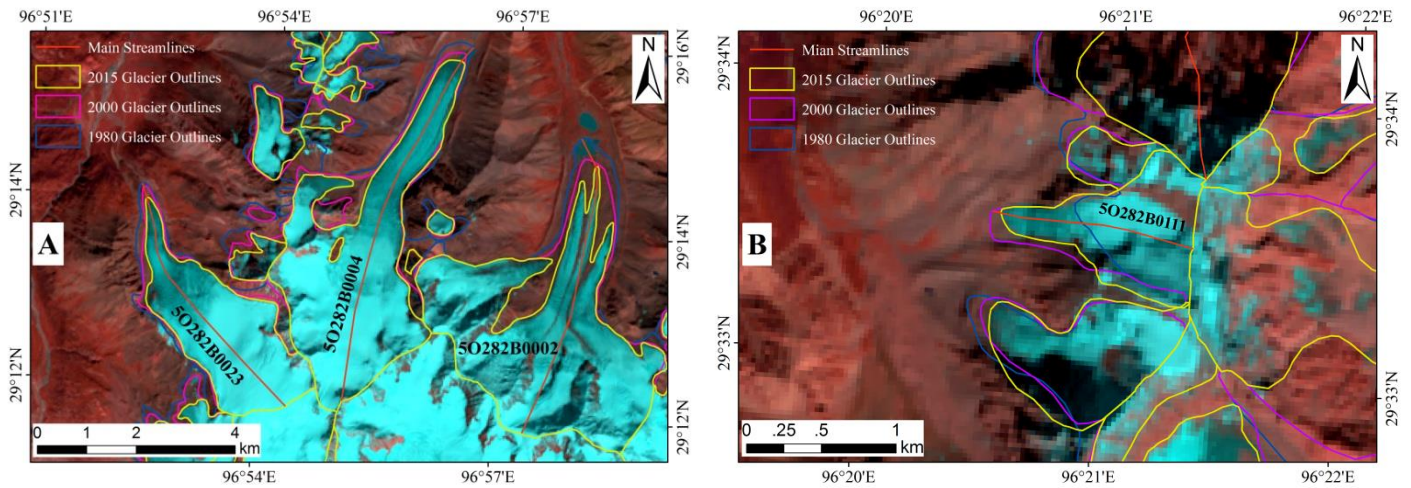

1  
2  
3  
4  
5  
6  
7  
8  
9  
10

Figure 3. Example of glacier outlines derived from imagery collected in 1980, 2000s and 2015. The background image is Landsat OLI image (6 October 2015). (A) Examples of glacier retreat. (B) An example of glacier advance.

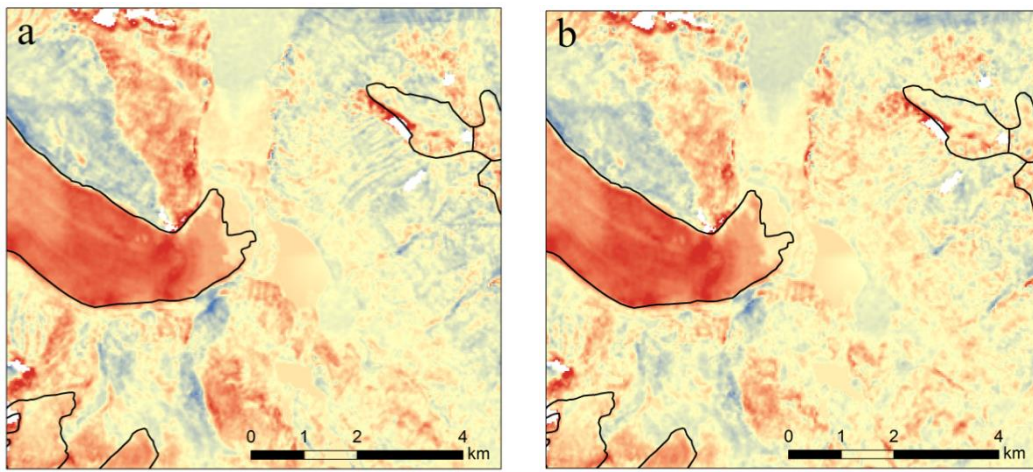

11

12  
13  
14  
15  
16  
17  
18

Figure 4. Elevation differences estimated between SRTM and TOPO DEM before (a) and after (b) the co-registration in the northern slope of Kangri Karpo Mountains. Location of the data example is shown in Fig. 6A.

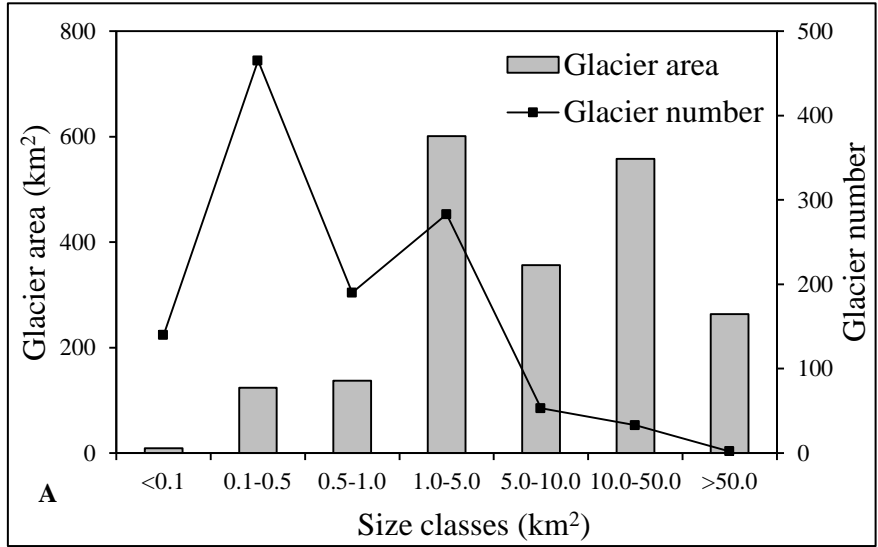

1

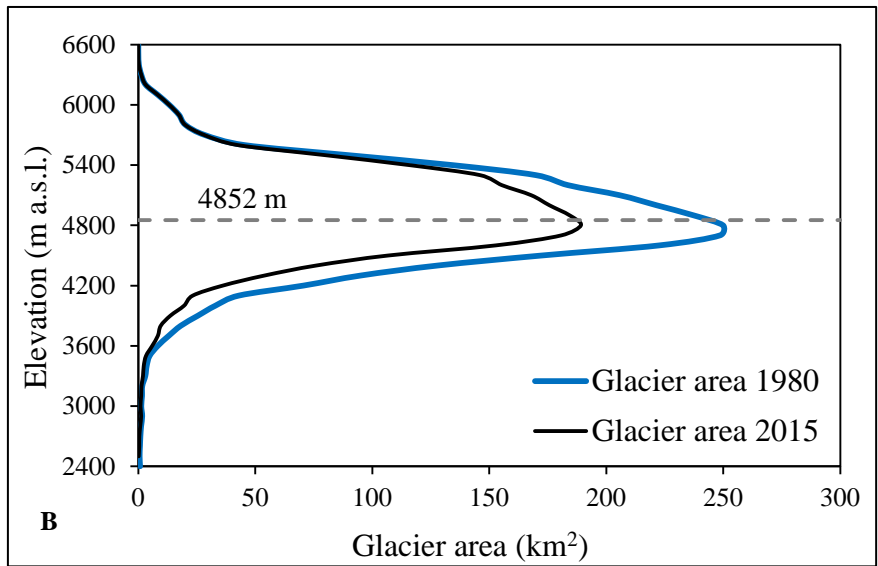

2

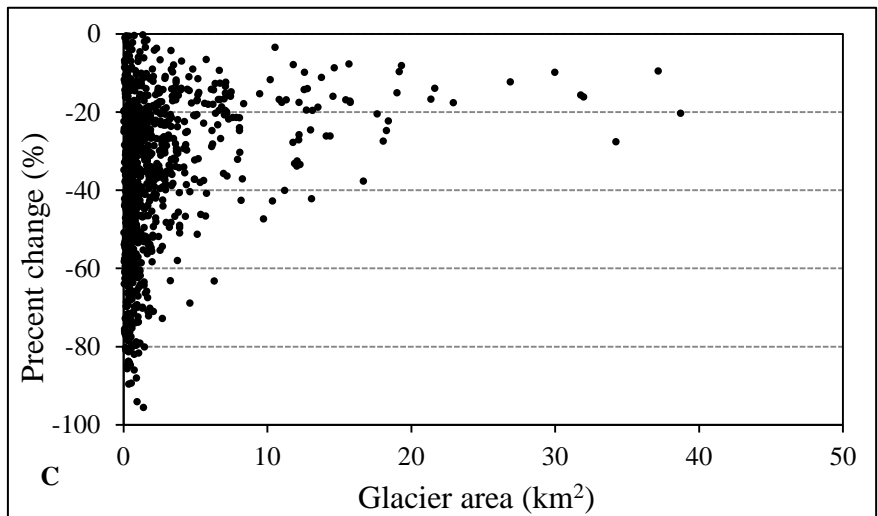

3

4 Figure 5. Glacier distribution and change in the Kangri Karpo Mountains. (A) Number and area of  
 5 glaciers in different size. (B) Hypsography of glaciers in 1980 and 2015, the dashed line depicts  
 6 value of median elevation. (C) Percentage changes of glaciers from 1980 – 2015.

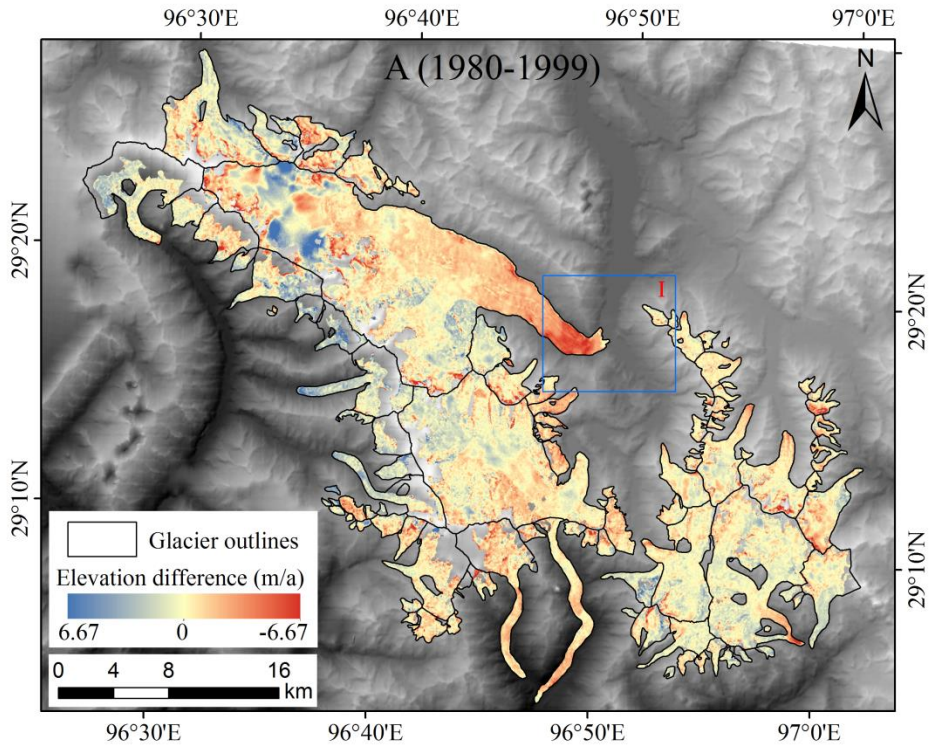

1

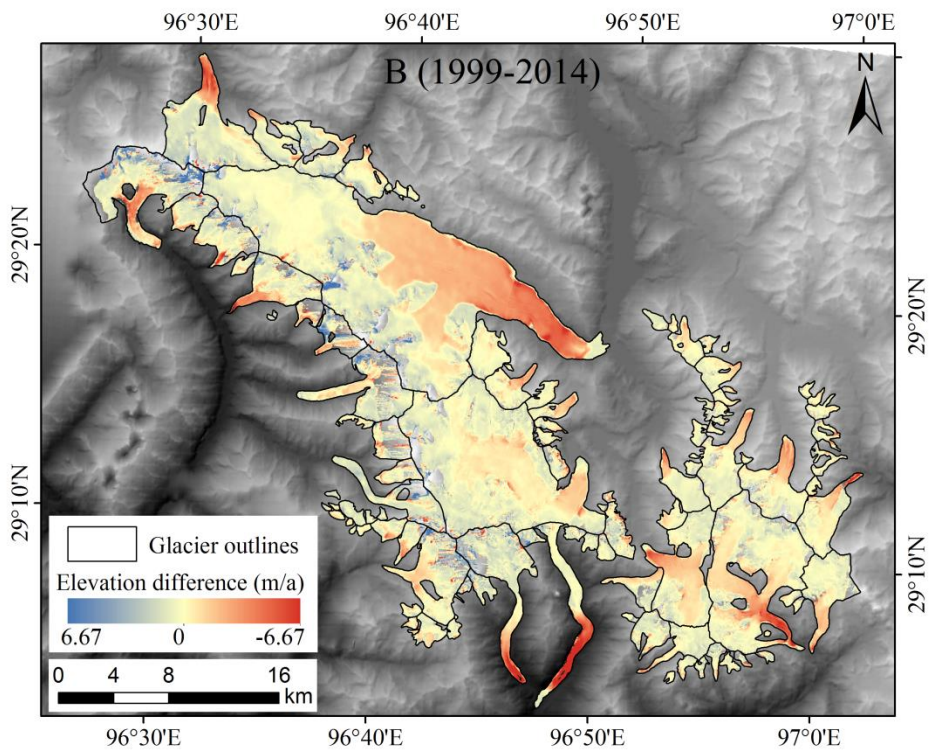

2



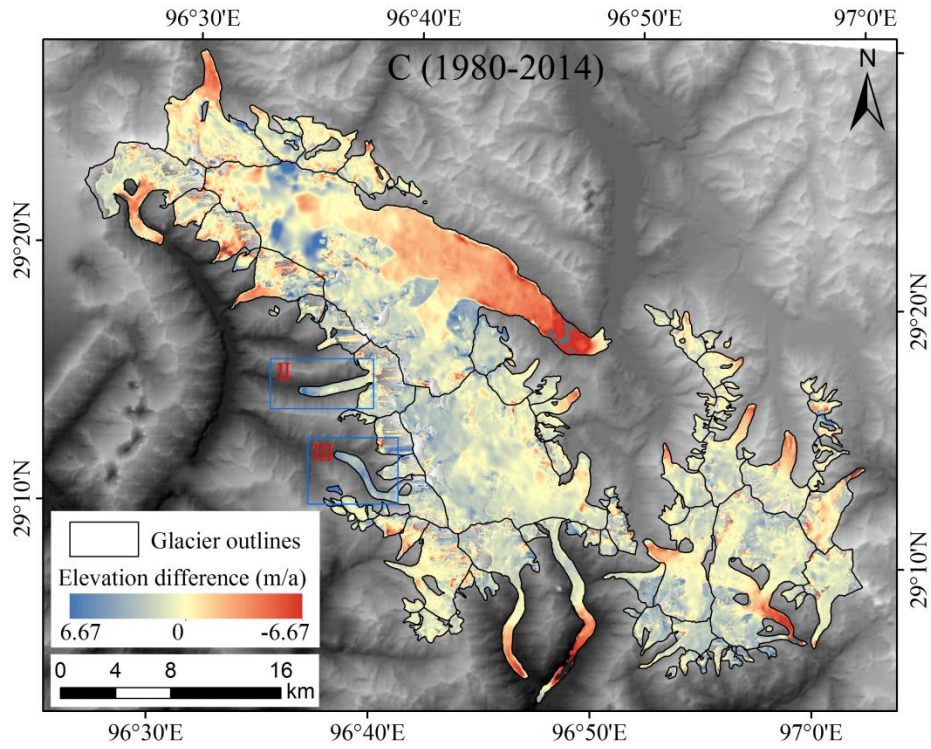

1  
 2 Figure 6. Elevation changes of the detailed study area of Kangri Karpo Mountains from 1980 –  
 3 2014. The glacier outlines are based on the geometric union of the 1980, 2000s and 2015 glacier  
 4 extent. II and III are two glaciers with positive elevation changes in glacier tongue.

5  
 6  
 7  
 8  
 9  
 10  
 11  
 12  
 13  
 14  
 15  
 16  
 17  
 18  
 19  
 20  
 21  
 22  
 23  
 24  
 25  
 26

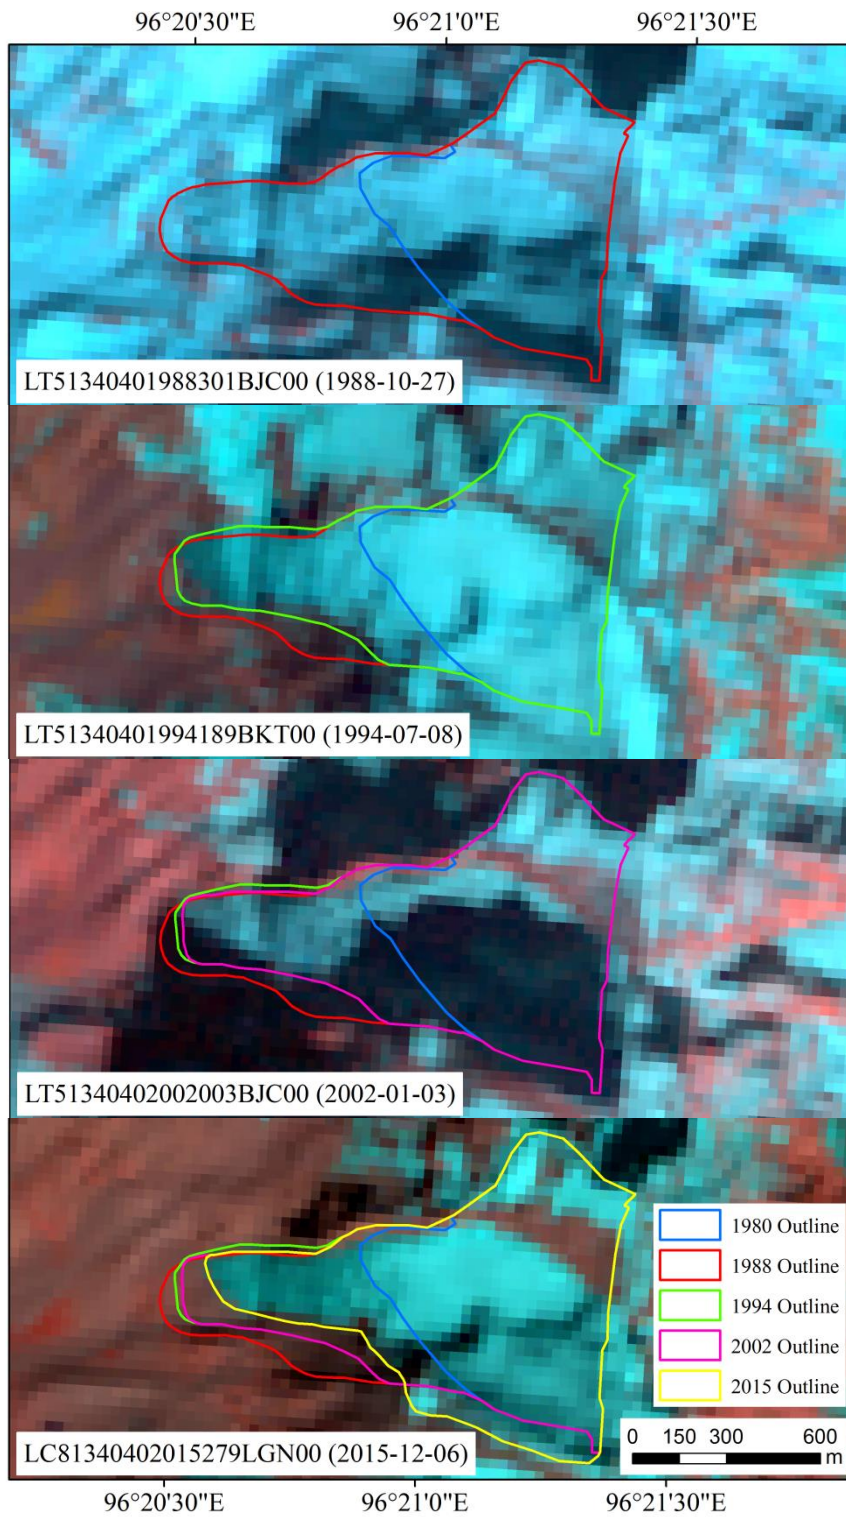

1 Figure 7. Terminus changes of Glacier 5O282B0111 from 1980 – 2015.

- 2
- 3
- 4
- 5
- 6
- 7
- 8

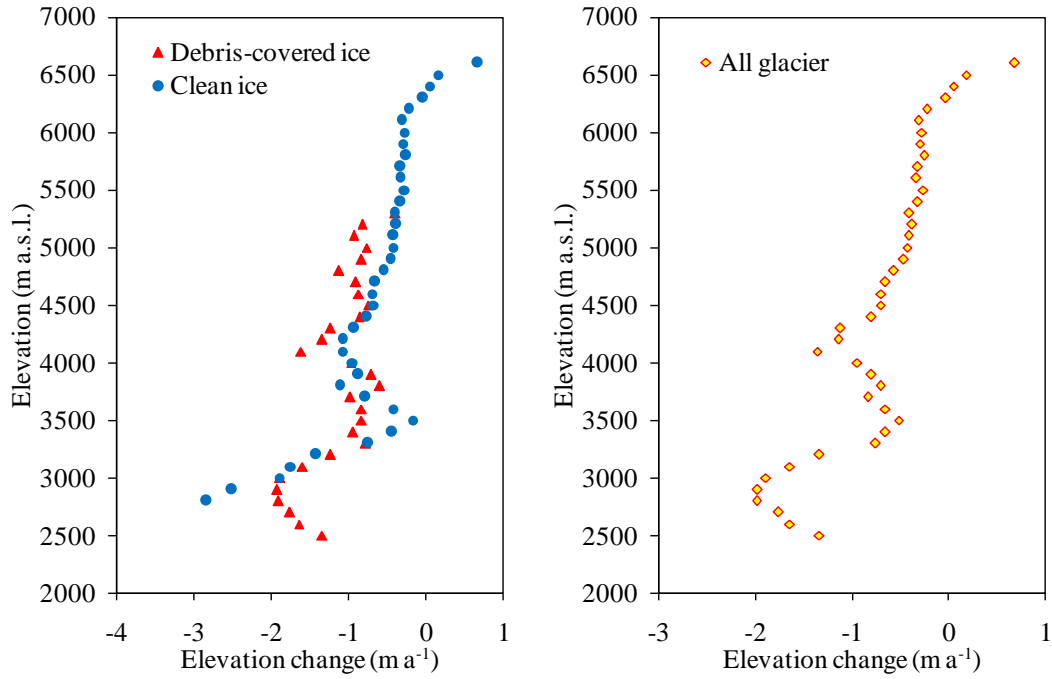

1  
2  
3  
4  
5  
6

Figure 8. Glacier elevation changes at each 100 m interval by altitude in the detailed study of Kangri Karpo Mountains for the clean ice, debris-covered ice and all glaciers for the period 1980 – 2014

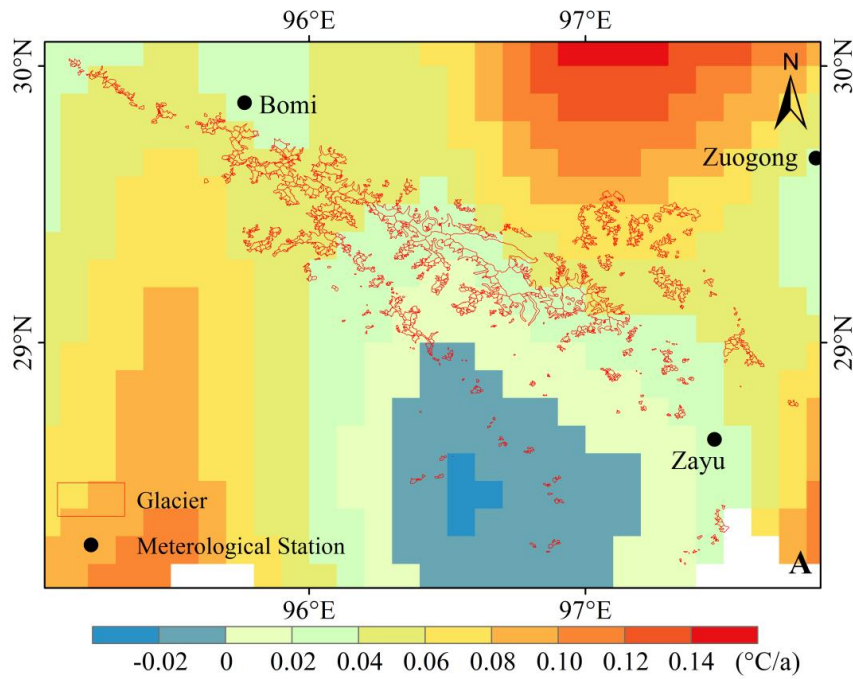

7  
8

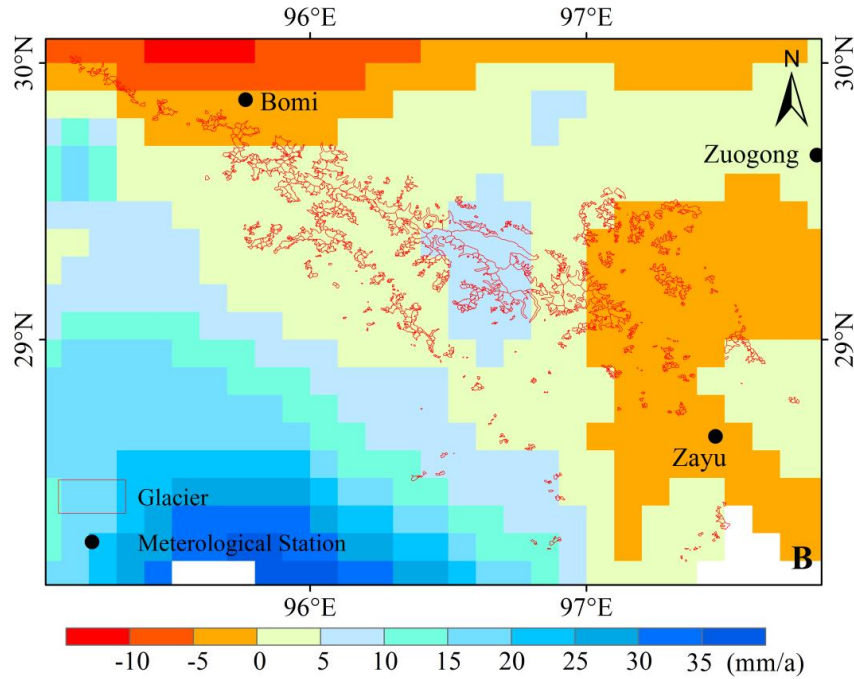

1

2 Figure 9. The changes of temperature and precipitation (from May to September) in the Kangri  
 3 Karmo Mountains during 1979 – 2012. (A) temperature, (B) precipitation.

4

5 Table 1. Overview of satellite images and data sources.

| Date                | Source           | ID                                                                                                                                               | Pixel size (m) | Utilization                                       |
|---------------------|------------------|--------------------------------------------------------------------------------------------------------------------------------------------------|----------------|---------------------------------------------------|
| October 1980        | Topographic Maps | -                                                                                                                                                | 12             | Glacier identification for 1980                   |
| October 1980        | TOPO DEM         | H47e016002/H47e017002/ H47e018002<br>H47e016003/H47e017003/ H47e018003<br>H47e016004/H47e017004/ H47e018004<br>H47e016005/H47e017005/ H47e018005 | 30             | Estimation of glacier elevation change            |
| 18 December 2001    | Landsat TM       | LT51340402001352BJC00                                                                                                                            | 30             | Validate and update the GAMDAM and CGI2 inventory |
| 3 January 2002      | Landsat TM       | LT51340402002003BJC00                                                                                                                            | 30             |                                                   |
| 23 October 2001     | Landsat ETM+     | LE71340402001296SGS00                                                                                                                            | 15             |                                                   |
| 11-22 February 2000 | SRTM C-band      | -                                                                                                                                                | 30             | Estimation of glacier elevation change            |
| 29 September 2015   | Landsat OLI      | LC81330402015272LGN00                                                                                                                            | 15             | Glacier identification for 2015                   |
| 6 October 2015      | Landsat OLI      | LC81340402015279LGN00                                                                                                                            | 15             |                                                   |
| 25 July 2015        | Landsat OLI      | LC81350392015206LGN00                                                                                                                            | 15             |                                                   |
| 18 February 2014    | TSX/TDX          | TDM1_SAR_COS_BIST_SM_S_SRA<br>_20140313T113609_20140313T113617                                                                                   | 12             | Estimation of glacier elevation change            |
| 13 March 2014       | TSX/TDX          | TDM1_SAR_COS_BIST_SM_S_SRA<br>_20140313T113609_20140313T113617                                                                                   | 12             |                                                   |

1 Table 2. Statistics of vertical errors between the TOPO, SRTM and TSX/TDX. MED is mean  
 2 elevation difference, STDV is standard deviation, N is the number of considered pixels, SE is  
 3 standard error and  $\sigma$  is the overall error of the derived surface elevation change.

| Region       | Item           | MED (m) | STDV (m) | N     | SE (m) | $\sigma$ (m) |
|--------------|----------------|---------|----------|-------|--------|--------------|
| 5O282B basin | SRTM - TOPO    | -0.65   | 7.44     | 866   | 0.25   | 0.70         |
|              | TSX/TDX - SRTM | -0.90   | 5.83     | 7807  | 0.07   | 0.90         |
|              | TSX/TDX - TOPO | -1.42   | 5.07     | 7807  | 0.06   | 1.42         |
| 5O291B basin | SRTM - TOPO    | 0.75    | 8.19     | 963   | 0.26   | 0.80         |
|              | TSX/TDX - SRTM | 0.07    | 12.68    | 8549  | 0.14   | 0.15         |
|              | TSX/TDX - TOPO | 0.71    | 5.50     | 8549  | 0.06   | 0.71         |
| Total        | SRTM - TOPO    | 0.67    | 16.41    | 1829  | 0.38   | 0.77         |
|              | TSX/TDX - SRTM | -0.42   | 9.93     | 16356 | 0.08   | 0.43         |
|              | TSX/TDX - TOPO | -0.53   | 5.36     | 16356 | 0.04   | 0.53         |

4

5

Table 3. Glacier area changes in the Kangri Karpo Mountains from 1980 – 2015

| Year      | 5O291B basin            |                             | 5O291B basin            |                             | Detailed study area     |                             | Whole Mountain Range    |                             |
|-----------|-------------------------|-----------------------------|-------------------------|-----------------------------|-------------------------|-----------------------------|-------------------------|-----------------------------|
|           | Area (km <sup>2</sup> ) | Change (% a <sup>-1</sup> ) | Area (km <sup>2</sup> ) | Change (% a <sup>-1</sup> ) | Area (km <sup>2</sup> ) | Change (% a <sup>-1</sup> ) | Area (km <sup>2</sup> ) | Change (% a <sup>-1</sup> ) |
| 1980      | 470.31 ± 4.82           |                             | 314.28 ± 4.39           |                             | 784.60 ± 5.02           |                             | 2728.00 ± 34.24         |                             |
| 2000s     | 432.91 ± 6.31           | -0.40 ± 0.08                | 287.97 ± 6.02           | -0.42 ± 0.12                | 720.88 ± 7.20           | -0.41 ± 0.06                | -                       | -                           |
| 2015      | 406.67 ± 6.76           | -0.40 ± 0.14                | 254.46 ± 7.25           | -0.78 ± 0.22                | 664.88 ± 7.83           | -0.52 ± 0.10                | 2048.50 ± 48.65         | -                           |
| 1980-2015 |                         | -0.39 ± 0.05                |                         | -0.54 ± 0.08                |                         | -0.44 ± 0.03                |                         | -0.71 ± 0.06                |

Table 4. Area changes for ten sample glaciers in the detailed study area of Kangri Karpo Mountains.

| ID | Glacier           | WGI ID/<br>GLIMS ID           | 1980 Area<br>(km <sup>2</sup> ) | 1980 – 2000                           |                                       |                              | 2000 – 2015                           |                                       |                              | 1980 – 2015                           |                                       |                              |
|----|-------------------|-------------------------------|---------------------------------|---------------------------------------|---------------------------------------|------------------------------|---------------------------------------|---------------------------------------|------------------------------|---------------------------------------|---------------------------------------|------------------------------|
|    |                   |                               |                                 | $\Delta a$ abs.<br>(km <sup>2</sup> ) | $\Delta a$ rel.<br>(km <sup>2</sup> ) | Rate<br>(% a <sup>-1</sup> ) | $\Delta a$ abs.<br>(km <sup>2</sup> ) | $\Delta a$ rel.<br>(km <sup>2</sup> ) | Rate<br>(% a <sup>-1</sup> ) | $\Delta a$ abs.<br>(km <sup>2</sup> ) | $\Delta a$ rel.<br>(km <sup>2</sup> ) | Rate<br>(% a <sup>-1</sup> ) |
| 1  | Danong            | 5O282B0002/<br>G096960E29217N | 15.46                           | -0.87                                 | -5.6%                                 | -0.28%                       | -1.74                                 | -11.9%                                | -0.80%                       | -2.61                                 | -16.9%                                | -0.48%                       |
| 2  | Parlung NO.<br>4  | 5O282B0004/<br>G096920E29228N | 13.52                           | -1.56                                 | -11.5%                                | -0.58%                       | -0.97                                 | -8.1%                                 | -0.54%                       | -2.53                                 | -18.7%                                | -0.53%                       |
| 3  | Parlung NO.<br>10 | 5O282B0010/<br>G096904E29286N | 4.98                            | -0.55                                 | -11.1%                                | -0.55%                       | -0.49                                 | -11.1%                                | -0.74%                       | -1.04                                 | -20.9%                                | -0.60%                       |
| 4  | Zuoqiupu          | 5O282B0023/<br>G096891E29212N | 7.46                            | -0.76                                 | -10.2%                                | -0.51%                       | -0.43                                 | -6.4%                                 | -0.43%                       | -1.19                                 | -15.9%                                | -0.45%                       |
| 5  | Bimaque           | 5O282B0025/<br>G096897E29157N | 26.71                           | -1.25                                 | -4.7%                                 | -0.23%                       | -2.45                                 | -9.6%                                 | -0.64%                       | -3.70                                 | -13.9%                                | -0.40%                       |
| 6  | Xirinongpu        | 5O282B0028/<br>G096745E29216N | 98.99                           | -2.50                                 | -2.5%                                 | -0.13%                       | -6.21                                 | -6.4%                                 | -0.43%                       | -8.71                                 | -8.8%                                 | -0.25%                       |
| 7  | Yalong            | 5O282B0037/<br>G096657E29334N | 193.43                          | -13.27                                | -6.9%                                 | -0.34%                       | -7.16                                 | -4.0%                                 | -0.27%                       | -20.43                                | -10.6%                                | -0.30%                       |
| 8  | /                 | 5O291B0151/<br>G096711E29143N | 19.17                           | -0.42                                 | -2.2%                                 | -0.11%                       | -1.43                                 | -7.6%                                 | -0.51%                       | -1.85                                 | -9.6%                                 | -0.28%                       |
| 9  | /                 | 5O291B0196/<br>G096943E29175N | 56.45                           | -2.42                                 | -4.3%                                 | -0.21%                       | -6.11                                 | -11.3%                                | -0.75%                       | -8.54                                 | -15.1%                                | -0.43%                       |
| 10 | /                 | 5O291B0200/<br>G097005E29155N | 14.66                           | -0.31                                 | -2.1%                                 | -0.10%                       | -0.95                                 | -6.6%                                 | -0.44%                       | -1.26                                 | -8.6%                                 | -0.25%                       |

Table 5. The length change of advanced glaciers in the Kangri Karpo Mountains. The uncertainty of glacier length in 1980 and 2015 are 6 m and 7.5 m, and the uncertainty of length change is 0.27 m a<sup>-1</sup>.

| WGI ID     | 1980       |                            | 2015       |                            | Length change<br>(m a <sup>-1</sup> ) | Lowering of<br>terminate<br>elevation (m) |
|------------|------------|----------------------------|------------|----------------------------|---------------------------------------|-------------------------------------------|
|            | Length (m) | Terminate<br>elevation (m) | Length (m) | Terminate<br>elevation (m) |                                       |                                           |
| 5O282B0111 | 762.75     | 5270                       | 1300.87    | 4951                       | 15.37                                 | 319                                       |
| 5O282B0223 | 961.93     | 4884                       | 1317.09    | 4637                       | 10.15                                 | 247                                       |
| 5O282B0225 | 1244.88    | 4705                       | 1793.16    | 4483                       | 15.67                                 | 222                                       |
| 5O282B0226 | 301.13     | 4870                       | 648.43     | 4680                       | 9.92                                  | 190                                       |
| 5O282B0278 | 604.73     | 4876                       | 707.97     | 4825                       | 2.95                                  | 51                                        |
| 5O283A0004 | 1067.55    | 4361                       | 2614.65    | 3949                       | 44.20                                 | 412                                       |
| 5O283B0022 | 481.76     | 4743                       | 625.38     | 4624                       | 4.10                                  | 119                                       |
| 5O291A0004 | 342.07     | 4796                       | 798.15     | 4762                       | 13.03                                 | 34                                        |
| 5O291B0201 | 4045.77    | 3931                       | 5047.28    | 3833                       | 28.61                                 | 98                                        |
| 5O291B0288 | 1277.50    | 4690                       | 1898.78    | 4563                       | 17.75                                 | 127                                       |



Table 6. The length change of glaciers in the detailed study area of Kangri Karpo Mountains. The uncertainty of glacier length in 1980, 2000s and 2015 are 6 m, 7.5 m and 7.5 m, respectively. And the uncertainty of length change during 1980 – 2000s, 2000s – 2015 and 1980 – 2015 are 0.48 m a<sup>-1</sup>, 0.71 m a<sup>-1</sup> and 0.27 m a<sup>-1</sup>, respectively.

| WGI ID     | Glacier length (m) |          |          | Length change (m a <sup>-1</sup> ) |              |             |
|------------|--------------------|----------|----------|------------------------------------|--------------|-------------|
|            | 1980               | 2000s    | 2015     | 1980 – 2000s                       | 2000s – 2015 | 1980 – 2015 |
| 5O282B0002 | 6271.16            | 5773.04  | 5635.20  | 24.91                              | 9.19         | 18.17       |
| 5O282B0004 | 7756.96            | 7540.24  | 7375.95  | 10.84                              | 10.95        | 10.89       |
| 5O282B0010 | 3167.28            | 2970.05  | 2853.12  | 9.86                               | 7.80         | 8.98        |
| 5O282B0013 | 3602.30            | 3119.71  | 2960.66  | 24.13                              | 10.60        | 18.33       |
| 5O282B0017 | 1631.20            | 1394.38  | 1261.97  | 11.84                              | 8.83         | 10.55       |
| 5O282B0023 | 5517.39            | 5431.23  | 5209.88  | 4.31                               | 14.76        | 8.79        |
| 5O282B0025 | 5357.49            | 4834.03  | 4548.90  | 26.17                              | 19.01        | 23.10       |
| 5O282B0028 | 16890.03           | 16228.66 | 15817.24 | 33.07                              | 27.43        | 30.65       |
| 5O282B0034 | 3925.35            | 3860.98  | 3832.31  | 3.22                               | 1.91         | 2.66        |
| 5O282B0037 | 32868.46           | 31309.45 | 31105.27 | 77.95                              | 13.61        | 50.38       |
| 5O282B0081 | 5306.99            | 5212.33  | 4920.24  | 4.73                               | 19.47        | 11.05       |
| 5O282B0083 | 8258.42            | 8102.68  | 7921.12  | 7.79                               | 12.10        | 9.64        |
| 5O291B0104 | 8209.80            | 8075.25  | 7922.90  | 6.73                               | 10.16        | 8.20        |
| 5O291B0108 | 7570.99            | 7200.65  | 6725.48  | 18.52                              | 31.68        | 24.16       |
| 5O291B0113 | 7677.91            | 7627.05  | 7580.98  | 2.54                               | 3.07         | 2.77        |
| 5O291B0117 | 15664.48           | 15572.74 | 15456.43 | 4.59                               | 7.75         | 5.94        |
| 5O291B0150 | 3509.59            | 2677.17  | 2535.09  | 41.62                              | 9.47         | 27.84       |
| 5O291B0151 | 6681.68            | 6329.14  | 6309.40  | 17.63                              | 1.32         | 10.64       |
| 5O291B0179 | 13104.49           | 13037.72 | 12473.61 | 3.34                               | 37.61        | 18.02       |
| 5O291B0181 | 15536.55           | 15309.66 | 13137.82 | 11.34                              | 144.79       | 68.54       |
| 5O291B0196 | 9241.01            | 7157.37  | 6812.94  | 104.18                             | 22.96        | 69.37       |
| 5O291B0200 | 7698.33            | 7449.66  | 7013.83  | 12.43                              | 29.05        | 19.56       |
| 5O291B0372 | 7681.85            | 7236.61  | 6251.62  | 22.26                              | 65.67        | 40.86       |

Table 7. Mean surface elevation changes and mass balance for the single glaciers and different regions in the detailed study area of Kangri Karpo Mountains from 1980 – 2014. Glacier area is the geometric union of the 1980 glacier area, 2000s glacier area and 2015 glacier area. Mean  $\Delta H$  is mean surface elevation changes and Mass balance is annual mass budgets.

| Region                | Glacier area<br>(km <sup>2</sup> ) | 1980 – 2000         |                                            | 2000 – 2014         |                                            | 1980 – 2014         |                                            |            |
|-----------------------|------------------------------------|---------------------|--------------------------------------------|---------------------|--------------------------------------------|---------------------|--------------------------------------------|------------|
|                       |                                    | Mean $\Delta H$ (m) | Mass balance<br>( m w.e. a <sup>-1</sup> ) | Mean $\Delta H$ (m) | Mass balance<br>( m w.e. a <sup>-1</sup> ) | Mean $\Delta H$ (m) | Mass balance<br>( m w.e. a <sup>-1</sup> ) |            |
| 1                     | 5O282B0002                         | 15.48               | -11.05±0.70                                | -0.44±0.14          | -13.33±0.91                                | -0.86±0.22          | -20.66±1.42                                | -0.55±0.22 |
| 2                     | 5O282B0004                         | 13.63               | -7.70±0.70                                 | -0.29±0.14          | -10.16±0.91                                | -0.65±0.22          | -15.17±1.42                                | -0.40±0.22 |
| 3                     | 5O282B0010                         | 4.99                | -10.31±0.70                                | -0.41±0.14          | -10.47±0.91                                | -0.67±0.22          | -21.44±1.42                                | -0.57±0.22 |
| 4                     | 5O282B0023                         | 7.46                | -6.28±0.70                                 | -0.23±0.14          | -8.71±0.91                                 | -0.56±0.22          | -14.14±1.42                                | -0.37±0.22 |
| 5                     | 5O282B0025                         | 26.72               | -4.24±0.70                                 | -0.13±0.14          | -13.72±0.91                                | -0.88±0.22          | -14.52±1.42                                | -0.38±0.22 |
| 6                     | 5O282B0028                         | 98.99               | -5.93±0.70                                 | -0.21±0.14          | -8.90±0.91                                 | -0.57±0.22          | -10.99±1.42                                | -0.29±0.22 |
| 7                     | 5O282B0037                         | 193.45              | -9.21±0.70                                 | -0.36±0.14          | -15.21±0.91                                | -0.98±0.22          | -24.51±1.42                                | -0.65±0.22 |
| 5O282B basin          |                                    | 471.05              | -7.92±0.70                                 | -0.30±0.14          | 11.85±0.91                                 | -0.76±0.22          | -19.13±1.42                                | -0.51±0.22 |
| 8                     | 5O291B0151                         | 19.24               | -8.47±0.80                                 | -0.33±0.16          | -7.66±0.16                                 | -0.49±0.04          | -18.56±0.72                                | -0.49±0.11 |
| 9                     | 5O291B0196                         | 56.60               | -3.63±0.80                                 | -0.11±0.16          | -14.33±0.16                                | -0.92±0.04          | -15.25±0.72                                | -0.40±0.11 |
| 10                    | 5O291B0200                         | 14.66               | -2.93±0.80                                 | -0.08±0.16          | -10.49±0.16                                | -0.67±0.04          | -14.16±0.72                                | -0.37±0.11 |
| 5O291B basin          |                                    | 317.22              | -4.14±0.80                                 | -0.13±0.16          | -9.74±0.16                                 | -0.63±0.04          | -14.77±0.72                                | -0.39±0.11 |
| Accumulation region   |                                    | 530.19              | -4.95±0.77                                 | -0.22±0.16          | -5.69±0.43                                 | -0.37±0.10          | -12.06±0.54                                | -0.32±0.08 |
| Ablation region       |                                    | 258.08              | -5.98±0.77                                 | -0.27±0.16          | -21.00±0.43                                | -1.35±0.10          | -27.64±0.54                                | -0.73±0.08 |
| Debris-covered region |                                    | 56.87               | -8.87±0.77                                 | -0.40±0.16          | -27.39±0.43                                | -1.76±0.10          | -33.50±0.54                                | -0.89±0.08 |
| Clean-ice region      |                                    | 731.43              | -5.00±0.77                                 | -0.23±0.16          | -9.70±0.43                                 | -0.62±0.10          | -16.22±0.54                                | -0.43±0.08 |
| Total                 |                                    | 788.31              | -5.30±0.77                                 | -0.24±0.16          | -11.04±0.43                                | -0.71±0.10          | -17.46±0.54                                | -0.46±0.08 |
